# Supplementary material for: Cyclometalated iridium complexes for transfer hydrogenation of carbonyl groups in water
Source: Royal Society of Chemistry journal article supplement (doi:10.1039/c2gc36619c), 2013-01-01

# Cyclometalated iridium complexes for transfer hydrogenation of carbonyl groups in water

Yawen Wei<sup>a</sup>, Dong Xue,<sup>\*a</sup> Qian Lei,<sup>a</sup> Chao Wang<sup>a</sup> and Jianliang Xiao<sup>\*a,b</sup>

<sup>a</sup>Key Laboratory of Applied Surface and Colloid Chemistry of Ministry of Education,  
School of Chemistry & Chemical Engineering, Shaanxi Normal University, Xi'an,  
710062, P. R. China.

E-mail: Xudong\_welcome@snnu.edu.cn

<sup>b</sup>Liverpool Centre for Materials & Catalysis, Department of Chemistry, University of  
Liverpool, Oxford Street, Liverpool, L69 7ZD, UK

Fax: 44-151-7943588

E-mail: j.xiao@liv.ac.uk

## Supporting Information

|                                                                                                        |         |
|--------------------------------------------------------------------------------------------------------|---------|
| 1. General information                                                                                 | S2      |
| 2. General procedure for preparation of cyclometalated complexes                                       | S2      |
| 3. pH effect on transfer hydrogenation of acetophenone with precatalyst <b>1</b> and <b>2</b> in water | S2      |
| 4. General procedure for the reduction of ketones with the precatalyst <b>3</b>                        | S4      |
| 5. General procedure for the reduction of aldehydes with the precatalyst <b>3</b>                      | S4      |
| 6. Procedure for large scale transfer hydrogenation in water                                           | S5      |
| 7. Analytic data of catalysts and products                                                             | S5-S13  |
| 8. References                                                                                          | S14     |
| 9. Traces of <sup>1</sup> H NMR and <sup>13</sup> C NMR spectra                                        | S15-S45 |

### 1. General information

Unless otherwise specified, the chemicals were obtained commercially and used without further purification. MeOH was dried over magnesium and distilled prior to use. Dichloromethane (DCM) was dried over CaH<sub>2</sub> and distilled prior to use. Water was distilled water. NMR spectra were recorded on a Bruker 300 or 400 MHz NMR spectrometer with TMS as the internal standard. GC chromatography and GC-MS analysis was carried out on an Agilent 7890A GC with a HP-5 MS column (quartz capillary column, 30 m x 0.25 mm x 0.25 μm) and an Agilent 5975C mass-selective detector (58 psi helium gas, 58 psi hydrogen gas, injector temperature 250 °C, FID detector temperature 300 °C). Imines were prepared according to the literature.<sup>1</sup> The pH values were measured by a Sartorius PB-10 pH meter at 25 °C.

### 2. General procedure for preparation of cyclometalated complexes<sup>2,3,4</sup>

To IrCl<sub>3</sub>·3H<sub>2</sub>O (0.5 g, 1.35 mmol) in 13 mL methanol was added excess pentamethylcyclopentadiene (0.4 mL), the mixture was refluxed for 36 h. After the mixture was cooled to room temperature, the product [Cp\*IrCl<sub>2</sub>]<sub>2</sub> was isolated by filtration and washed with cold methanol and dried in *vacuo*.

[Cp\*IrCl<sub>2</sub>]<sub>2</sub> (1 equiv.), an imine ligand (2.2 equiv.) and NaOAc (10 equiv.) were placed into a Schlenk tube. The tube was then degassed and recharged with argon three times. DCM was then added and the resulting mixture was stirred at room temperature overnight. The reaction mixture was filtered through celite, and dried over Na<sub>2</sub>SO<sub>4</sub>. Following removal of the solvent under vacuum the resulting solid was washed with diethyl ether/petrol ether to afford cyclometalated iridium complexes.

### 3. pH effect on transfer hydrogenation of acetophenone with precatalyst 1 and 2 in water

(a) General procedure for transfer hydrogenation of acetophenone at different pH values  
Acetophenone (5 mmol), complex **1** or **2** (0.0025 mmol) and a magnetic stir bar were placed in a pressure tube. To the mixture was injected 4 mL HCOOH/HCOONa aqueous solution with the pH value shown in the text (**Scheme 1**). The mixture was bubbled with argon for 15 min, and then stirred at 80 °C for 1 h. After cooling to room temperature, the

reaction was quenched with aqueous  $\text{NaHCO}_3$  solution, and extracted with ethyl acetate (7 x 3 mL). The organic layers were washed with brine, and dried over  $\text{Na}_2\text{SO}_4$ . The conversion was determined by an Agilent 7890A GC with a HP-5 MS column (quartz capillary column, 30 m x 0.25 mm x 0.25  $\mu\text{m}$ ) and an Agilent 5975C mass-selective detector (58 psi helium gas, 58 psi hydrogen gas, injector temperature 250  $^\circ\text{C}$ , FID detector temperature 300  $^\circ\text{C}$ ). The retention time of acetophenone was 5.80 min, and the 1-phenylethanol was 5.71 min.

(b) Procedure for preparation of  $\text{HCOOH}/\text{HCOONa}$  aqueous solutions of different pH values

The solutions with different pH values used for reactions in **Scheme 1** in the text were prepared by mixing  $\text{HCOONa}$ ,  $\text{HCOOH}$  (88%, wt) and  $\text{H}_2\text{O}$  in a beaker and the pH values were measured by a pH meter at 25  $^\circ\text{C}$ .

$C^0$  = total moles of  $\text{HCOOH}$  and  $\text{HCOONa}$  added per liter of  $\text{H}_2\text{O}$ .

For pH 0.5, 2 g  $\text{HCOONa}$  (29.4 mmol), 10.3 mL  $\text{HCOOH}$  (88%, wt) (240 mmol) and 2.5 mL  $\text{H}_2\text{O}$  were used. The total concentration of  $\text{HCOONa}$  and  $\text{HCOOH}$ ,  $C^0 = 21$  mol/L.

For pH 1.55, 2 g  $\text{HCOONa}$  (29.4 mmol), 8.3 mL  $\text{HCOOH}$  (88%, wt) (194 mmol) and 2.8 mL  $\text{H}_2\text{O}$  were used. The total concentration of  $\text{HCOONa}$  and  $\text{HCOOH}$ ,  $C^0 = 20$  mol/L.

For pH 2.0, 2 g  $\text{HCOONa}$  (29.4 mmol), 5.2 mL  $\text{HCOOH}$  (88%, wt) (121 mmol) and 2.4 mL  $\text{H}_2\text{O}$  were used. The total concentration of  $\text{HCOONa}$  and  $\text{HCOOH}$ ,  $C^0 = 20$  mol/L.

For pH 3.0, 2 g  $\text{HCOONa}$  (29.4 mmol), 2.2 mL  $\text{HCOOH}$  (88%, wt) (51 mmol) and 2.8 mL  $\text{H}_2\text{O}$  were used. The total concentration of  $\text{HCOONa}$  and  $\text{HCOOH}$ ,  $C^0 = 16$  mol/L.

For pH 4.0, 2 g  $\text{HCOONa}$  (29.4 mmol), 1.1 mL  $\text{HCOOH}$  (88%, wt) (194 mmol) and 2.8 mL  $\text{H}_2\text{O}$  were used. The total concentration of  $\text{HCOONa}$  and  $\text{HCOOH}$ ,  $C^0 = 14$  mol/L.

For pH 4.5, 2 g  $\text{HCOONa}$  (29.4 mmol), 0.6 mL  $\text{HCOOH}$  (88%, wt) (14 mmol) and 2.8 mL  $\text{H}_2\text{O}$  were used. The total concentration of  $\text{HCOONa}$  and  $\text{HCOOH}$ ,  $C^0 = 13$  mol/L.

For pH 5.0, 3 g  $\text{HCOONa}$  (44.1 mmol), 0.4 mL  $\text{HCOOH}$  (88%, wt) (9 mmol) and 4.2 mL  $\text{H}_2\text{O}$  were used. The total concentration of  $\text{HCOONa}$  and  $\text{HCOOH}$ ,  $C^0 = 11$  mol/L.

For pH 5.2, 5 g HCOONa (73.5 mmol), 0.3 mL HCOOH (88%, wt) (7 mmol) and 7 mL H<sub>2</sub>O were used. The total concentration of HCOONa and HCOOH,  $C^0 = 11$  mol/L.

When  $C^0$  values varied from 11 mol/L to 20 mol/L, the effect of  $C^0$  on conversions at the same pH was less than 20% under the conditions above.

#### 4. General procedure for the reduction of ketones with the precatalyst **3**

Ketone (5 mmol), complex **3** (0.0025 mmol) and a magnetic stir bar were placed in a pressure tube. To the mixture was injected 4 mL HCOOH/HCOONa aqueous solution (pH = 2.5,  $C^0 = 20$  mol/L). The mixture was bubbled with argon for 15 min, and then stirred at 80 °C for 4 or 12 h. After cooling to room temperature, the reaction was quenched with aqueous NaHCO<sub>3</sub> solution, and extracted with ethyl acetate (7 x 3 mL). The organic layers were washed with brine, dried over Na<sub>2</sub>SO<sub>4</sub>, and evaporated. The product was purified by flash chromatography using petroleum ether and ethyl acetate as elute. 2 mL and 1 mL aqueous solution of HCOOH/HCOONa was used for S/C = 1000 and 500, respectively. For products with low boiling points, **7q** and **7r**, the yields were determined by GC. The retention times for ketone **6q** and alcohol **7q** were 5.22 min and 5.90 min respectively. The retention times for ketone **6r** and alcohol **7r** were 6.17 min and 6.65 min respectively.

#### 5. General procedure for the reduction of aromatic aldehydes with the precatalyst **3**

Aldehyde (2.5 mmol), complex **3** (0.0025 mmol) and a magnetic stir bar were placed in a pressure tube. To the mixture was injected 2 mL HCOOH/HCOONa aqueous solution (pH = 2.5,  $C^0 = 20$  mol/L). The mixture was bubbled with argon for 15 min, and then stirred at 80 °C for 12 h. After cooling to room temperature, the reaction was quenched with aqueous NaHCO<sub>3</sub> solution, and extracted with ethyl acetate (7 x 3 mL). The organic layers were washed with brine, dried over Na<sub>2</sub>SO<sub>4</sub>, and evaporated. The product was purified by flash chromatography using petroleum ether and ethyl acetate as elute. The volume of HCOOH/HCOONa aqueous solution was 4 mL for S/C = 2000.

## 6. Procedure for large scale transfer hydrogenation in water

Acetophenone (50 mmol), complex **3** (0.025 mmol) and a magnetic stir bar were placed in a pressure tube. To the mixture was injected 40 mL HCOOH/HCOONa aqueous solution (pH 2.5,  $C^0 = 20$  mol/L). The mixture was bubbled with argon for 15 min, and then stirred at 80 °C for 24 h. After cooling to room temperature, the reaction was quenched with aqueous NaHCO<sub>3</sub> solution, and extracted with ethyl acetate (50 x 3 mL). The organic layers were washed with brine, dried over Na<sub>2</sub>SO<sub>4</sub>, and evaporated. 5.82 g of product was obtained by flash chromatography using petroleum ether and ethyl acetate as elute (97% yield).

## 7. Analytic data of catalysts and products

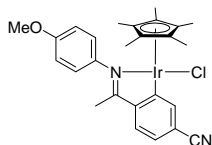

**Iridium complex 1<sup>4</sup>**: Yellow solid; <sup>1</sup>H NMR (300 MHz, CDCl<sub>3</sub>, 298 K) δ (ppm): 7.97 (s, 1H), 7.46 (d,  $J = 7.2$  Hz, 1H), 7.22 (d,  $J = 12.9$  Hz, 3H), 6.91 (s, 2H), 3.79 (s, 3H), 2.38 (s, 3H), 1.37 (s, 15H); <sup>13</sup>C NMR (75 MHz, CDCl<sub>3</sub>, 298 K) δ (ppm): 180.9, 167.6, 158.2, 151.9, 143.7, 138.3, 128.0, 124.4, 123.8, 119.5, 114.4, 89.9, 55.6, 17.1, 8.5; HRMS (ESI) for C<sub>26</sub>H<sub>28</sub>ClIrN<sub>2</sub>O [M-Cl]<sup>+</sup>: calc.: 577.1831. Found: 577.1818.

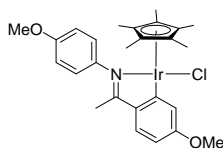

**Iridium complex 2<sup>4</sup>**: Red solid; <sup>1</sup>H NMR (400 MHz, CDCl<sub>3</sub>, 298 K) δ (ppm): 7.45 (d,  $J = 8.0$  Hz, 1H), 7.36 (d,  $J = 4.0$  Hz, 1H), 6.93 (d,  $J = 8.0$  Hz, 2H), 6.58 (dd,  $J = 8.0, 4.0$  Hz, 1H), 3.90 (s, 3H), 3.85 (s, 3H), 2.38 (s, 3H), 1.44 (s, 15H); <sup>13</sup>C NMR (101 MHz, CDCl<sub>3</sub>, 298 K) δ (ppm): 180.1, 170.4, 162.1, 157.6, 144.3, 141.3, 130.0, 124.5, 119.2, 112.8, 107.8, 89.0, 55.5, 55.0, 16.8, 8.6; HRMS (ESI) for C<sub>26</sub>H<sub>31</sub>ClIrNO<sub>2</sub> [M-Cl]<sup>+</sup>: calc.: 582.1984. Found: 582.1979.

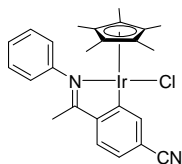

**Iridium complex 3:** Red solid;  $^1\text{H}$  NMR (300 MHz,  $\text{CDCl}_3$ , 298 K)  $\delta$  (ppm): 7.92 (s, 2H), 7.44-7.36 (m, 3H), 7.19 (dd,  $J = 17.6, 7.7$  Hz, 2H), 6.90 (s, 1H), 2.41 (s, 3H), 1.41 (s, 15H);  $^{13}\text{C}$  NMR (75 MHz,  $\text{CDCl}_3$ , 298 K)  $\delta$  (ppm): 180.8, 170.5, 150.5, 146.5, 137.4, 129.8, 127.4, 126.5, 124.5, 123.0, 89.4, 17.0, 8.4; HRMS (ESI) for  $\text{C}_{25}\text{H}_{26}\text{ClIrN}_2$   $[\text{M}-\text{Cl}]^+$ : calc.: 547.1725. Found: 547.1711.

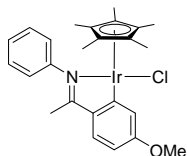

**Iridium complex 4:** Orange solid;  $^1\text{H}$  NMR (300 MHz,  $\text{CDCl}_3$ , 298 K)  $\delta$  (ppm): 7.49-7.35 (m, 4H), 7.23-7.20 (m, 3H), 6.59 (d,  $J = 7.9$  Hz, 1H), 3.91 (s, 3H), 2.39 (s, 3H), 1.42 (s, 15H);  $^{13}\text{C}$  NMR (75 MHz,  $\text{CDCl}_3$ , 298 K)  $\delta$  (ppm): 179.8, 170.8, 162.2, 150.9, 141.0, 130.1, 126.0, 119.3, 107.9, 89.0, 55.0, 16.8, 8.5; HRMS (ESI) for  $\text{C}_{25}\text{H}_{29}\text{ClIrNO}$   $[\text{M}-\text{Cl}]^+$ : calc.: 552.1878. Found: 552.1873.

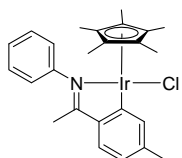

**Iridium complex 5:** Orange solid;  $^1\text{H}$  NMR (300 MHz,  $\text{CDCl}_3$ , 298 K)  $\delta$  (ppm): 7.64 (s, 1H), 7.41 (d,  $J = 7.4$  Hz, 3H), 7.25-7.21 (m, 2H), 6.84 (d,  $J = 7.2$  Hz, 2H), 2.45 (s, 3H), 2.41 (s, 3H), 1.41 (s, 15H);  $^{13}\text{C}$  NMR (75 MHz,  $\text{CDCl}_3$ , 298 K)  $\delta$  (ppm): 180.8, 168.4, 150.8, 145.0, 142.1, 135.8, 128.4, 126.1, 122.6, 89.0, 22.0, 16.8, 8.4; HRMS (ESI) for  $\text{C}_{25}\text{H}_{29}\text{ClIrN}$   $[\text{M}-\text{Cl}]^+$ : calc.: 536.1929. Found: 536.1925.

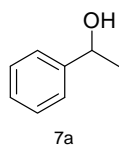

7a

**1-Phenylethanol 7a<sup>5</sup>**: 585mg; 96% yield (S/C=2000); pale yellow liquid; <sup>1</sup>H NMR (300 MHz, CDCl<sub>3</sub>) δ (ppm): 7.33-7.31 (m, 5H), 4.82 (q, *J* = 6.4 Hz, 1H), 2.36 (s, 1H), 1.44 (d, *J* = 6.4 Hz, 3H); <sup>13</sup>C NMR (75 MHz, CDCl<sub>3</sub>) δ (ppm): 145.9, 128.5, 127.4, 125.4, 70.3, 25.1; MS(EI) for C<sub>8</sub>H<sub>10</sub>O [M+H]<sup>+</sup>: 123.

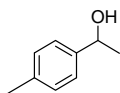

7b

**1-(4-Tolyl)ethanol 7b<sup>5</sup>**: 591mg; 87% yield (S/C=2000); pale yellow liquid; <sup>1</sup>H NMR (300 MHz, CDCl<sub>3</sub>) δ (ppm): 7.19 (d, *J* = 6.0, 2H), 7.10 (d, *J* = 6.0, 2H), 4.4 (q, *J* = 6.4 Hz, 1H), 2.59 (d, *J* = 10.2 Hz, 1H), 2.30 (s, 3H), 1.40 (d, *J* = 6.3 Hz, 3H); <sup>13</sup>C NMR (75 MHz, CDCl<sub>3</sub>) δ (ppm): 143.0, 137.0, 129.1, 125.4, 70.1, 25.1, 21.1; MS (EI) for C<sub>9</sub>H<sub>12</sub>O [M+H]<sup>+</sup>: 137.

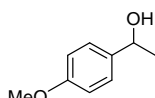

7c

**1-(4-Methoxyphenyl)ethanol 7c<sup>6</sup>**: 60mg; 79% yield (S/C=200); pale yellow liquid; <sup>1</sup>H NMR (300 MHz, CDCl<sub>3</sub>) δ (ppm): 7.27 (d, *J* = 7.7 Hz, 2H), 6.86 (d, *J* = 7.9 Hz, 2H), 4.80 (q, *J* = 6.4, 1H), 3.77 (s, 3H), 2.30 (brs, 1H), 1.44 (d, *J* = 6.4 Hz, 3H); <sup>13</sup>C NMR (75 MHz, CDCl<sub>3</sub>) δ (ppm): 159.0, 138.1, 126.7, 113.9, 69.9, 55.3, 25.0; MS(EI) for C<sub>9</sub>H<sub>12</sub>O<sub>2</sub> [M+H]<sup>+</sup>: 153.

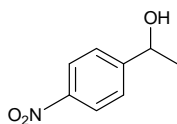

7d

**1-(4-Nitrophenyl)ethanol 7d<sup>7</sup>**: 812mg; 97% yield (S/C=2000); yellow solid; <sup>1</sup>H NMR (300 MHz, CDCl<sub>3</sub>) δ (ppm): 8.13 (d, *J* = 8.5 Hz, 2H), 7.52 (d, *J* = 8.4 Hz, 2H), 4.99 (d, *J* = 6.4 Hz, 1H), 3.06 (brs, 1H), 1.49 (d, *J* = 6.4 Hz, 3H); <sup>13</sup>C NMR (75 MHz, CDCl<sub>3</sub>) δ (ppm): 153.4, 147.0, 126.1, 123.6, 69.3, 25.3; HRMS(ESI) for C<sub>8</sub>H<sub>9</sub>NO<sub>3</sub> [M+Na]<sup>+</sup>, *m/z* calc.: 190.0480, found: 190.0483.

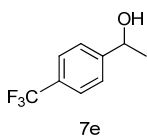

**1-(4-(Trifluoromethyl)phenyl)ethanol 7e<sup>6</sup>**: 904mg; 95% yield (S/C=2000); pale yellow liquid; <sup>1</sup>H NMR (300 MHz, CDCl<sub>3</sub>) δ (ppm): 7.57 (d, *J* = 7.9 Hz, 2H), 7.42 (d, *J* = 7.9 Hz, 2H), 4.87 (d, *J* = 6.4 Hz, 1H), 2.85 (d, *J* = 4.9 Hz, 1H), 1.44 (d, *J* = 6.4 Hz, 3H); <sup>13</sup>C NMR (75 MHz, CDCl<sub>3</sub>) δ (ppm): 149.7, 129.6 (q, <sup>2</sup>*J*<sub>C-F</sub> = 32.0 Hz), 125.8, 125.5 (q, <sup>3</sup>*J*<sub>C-F</sub> = 4.0 Hz), 124.3 (q, <sup>1</sup>*J*<sub>C-F</sub> = 270.0 Hz), 69.7, 25.2; HRMS(ESI) for C<sub>9</sub>H<sub>9</sub>F<sub>3</sub>O [M-H]<sup>-</sup>, *m/z* calc.: 189.0527, found: 189.0539.

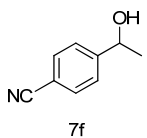

**4-(1-Hydroxyethyl)benzotrile 7f<sup>8</sup>**: 333mg; 91% yield (S/C=1000); pale yellow liquid; <sup>1</sup>H NMR (300 MHz, CDCl<sub>3</sub>) δ (ppm): 7.62 (d, *J* = 8.0 Hz, 2H), 7.48 (d, *J* = 7.9 Hz, 2H), 4.95 (d, *J* = 6.4 Hz, 1H), 2.27 (s, 1H), 1.49 (d, *J* = 6.4 Hz, 3H); <sup>13</sup>C NMR (75 MHz, CDCl<sub>3</sub>) δ (ppm): 151.4, 132.3, 126.1, 118.9, 110.7, 69.4, 25.3; MS(EI) for C<sub>9</sub>H<sub>9</sub>NO [M+H]<sup>+</sup>: 148.

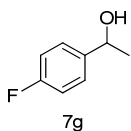

**1-(4-Fluorophenyl)ethanol 7g<sup>6</sup>**: 623mg; 89% yield (S/C=2000); pale yellow liquid; <sup>1</sup>H NMR (300 MHz, CDCl<sub>3</sub>) δ (ppm): 7.29 (d, *J* = 19.5 Hz, 2H), 7.02 (t, *J* = 7.6 Hz, 2H), 4.87 (d, *J* = 6.0 Hz, 1H), 1.98 (s, 1H), 1.46 (d, *J* = 6.1 Hz, 3H); <sup>13</sup>C NMR (75 MHz, CDCl<sub>3</sub>) δ (ppm): 162.5 (d, <sup>1</sup>*J*<sub>C-F</sub> = 243.8 Hz), 141.6, 127.1 (d, <sup>3</sup>*J*<sub>C-F</sub> = 7.5 Hz), 115.1 (d, <sup>2</sup>*J*<sub>C-F</sub> = 21.0 Hz), 69.6, 25.2; MS(EI) for C<sub>8</sub>H<sub>9</sub>FO [M+H]<sup>+</sup>: 141.

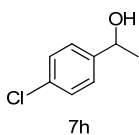



**1-(4-Chlorophenyl)ethanol 7h<sup>9</sup>**: 354mg; 89% yield (S/C=1000); pale yellow liquid; <sup>1</sup>H NMR (300 MHz, CDCl<sub>3</sub>) δ (ppm): 7.29 (d, *J* = 5.7 Hz, 4H), 4.86 (q, *J* = 6.0 Hz, 1H), 1.90 (s, 1H), 1.45 (d, *J* = 6.0 Hz, 3H); <sup>13</sup>C NMR (75 MHz, CDCl<sub>3</sub>) δ (ppm): 144.3, 133.0, 128.5, 126.8, 69.6, 25.2; MS(EI) for C<sub>8</sub>H<sub>9</sub>ClO [M+H]<sup>+</sup>: 157.

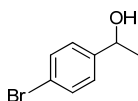

7i

**1-(4-Bromophenyl)ethanol 7i<sup>5</sup>**: 470mg; 94% yield (S/C=1000); pale yellow solid; <sup>1</sup>H NMR (300 MHz, CDCl<sub>3</sub>) δ (ppm): 7.46 (d, *J* = 8.2 Hz, 2H), 7.24 (d, *J* = 8.3 Hz, 2H), 4.86 (q, *J* = 6.0 Hz, 1H), 1.88 (s, 1H), 1.46 (d, *J* = 6.3 Hz, 3H); <sup>13</sup>C NMR (75 MHz, CDCl<sub>3</sub>) δ (ppm): 144.8, 131.5, 127.18, 121.1, 69.6, 25.2; MS(EI) for C<sub>8</sub>H<sub>9</sub>BrO [M+H]<sup>+</sup>: 201.

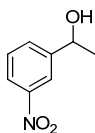

7j

**1-(3-Nitrophenyl)ethanol 7j<sup>7</sup>**: 803mg; 96% yield (S/C=2000); yellow solid; <sup>1</sup>H NMR (300 MHz, CDCl<sub>3</sub>) δ (ppm): 8.21 (s, 1H), 8.07 (d, *J* = 6.8 Hz, 1H), 7.69 (s, 1H), 7.49 (t, *J* = 6.0 Hz, 1H), 4.99 (d, *J* = 6.0 Hz, 1H), 2.90 (brs, 1H), 1.51 (d, *J* = 6.0 Hz, 3H); <sup>13</sup>C NMR (75 MHz, CDCl<sub>3</sub>) δ: 148.1, 131.7, 129.4, 122.2, 120.3, 69.2, 25.3; HRMS(ESI) for C<sub>8</sub>H<sub>9</sub>NO<sub>3</sub> [M+Na]<sup>+</sup>, calc.: 190.0480, found: 190.0485.

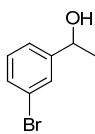

7k

**1-(3-Bromophenyl)ethanol 7k<sup>5</sup>**: 937mg; 93% yield (S/C=2000); pale yellow liquid; <sup>1</sup>H NMR (300 MHz, CDCl<sub>3</sub>) δ (ppm): 7.48 (s, 1H), 7.36 (d, *J* = 7.3 Hz, 1H), 7.20 (dd, *J* = 12.9, 7.4 Hz, 2H), 4.76 (q, *J* = 6.4 Hz, 1H), 2.77 (s, 1H), 1.41 (d, *J* = 6.4 Hz, 3H); <sup>13</sup>C NMR (75 MHz, CDCl<sub>3</sub>) δ (ppm): 148.2, 130.4, 130.1, 128.6, 124.1, 122.6, 69.6, 25.2; MS(EI) for C<sub>8</sub>H<sub>9</sub>BrO [M+H]<sup>+</sup>: 201.

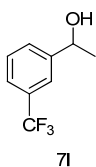

**1-(3-(Trifluoromethyl)phenyl)ethanol 7l<sup>o</sup>**: 860mg; 91% yield (S/C=2000); pale yellow liquid; <sup>1</sup>H NMR (300 MHz, CDCl<sub>3</sub>) δ (ppm): 7.62 – 7.43 (m, 4H), 4.90 (q, *J* = 6.4 Hz, 1H), 2.49 (s, 1H), 1.47 (d, *J* = 6.4 Hz, 3H); <sup>13</sup>C NMR (75 MHz, CDCl<sub>3</sub>) δ (ppm): 146.8, 130.5 (q, <sup>2</sup>*J*<sub>C-F</sub> = 32.0 Hz), 128.8, 125.9 (q, <sup>1</sup>*J*<sub>C-F</sub> = 246.8 Hz), 124.0, 122.2, 69.7, 25.2; MS(EI) for C<sub>9</sub>H<sub>9</sub>F<sub>3</sub>O [M+H]<sup>+</sup>: 191.

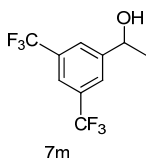

**1-(3,5-Bis(trifluoromethyl)phenyl)ethanol 7m<sup>8</sup>**: 580mg; 90% yield (S/C=1000); pale yellow liquid; <sup>1</sup>H NMR (300 MHz, CDCl<sub>3</sub>) δ (ppm): 7.83 (s, 2H), 7.79 (s, 1H), 5.02 (q, *J* = 6.4 Hz, 1H), 2.30 (s, 1H), 1.53 (d, *J* = 6.4 Hz, 3H); <sup>13</sup>C NMR (75 MHz, CDCl<sub>3</sub>) δ (ppm): 148.2, 131.8 (q, <sup>2</sup>*J*<sub>C-F</sub> = 33.0 Hz), 125.6, 123.2 (q, <sup>1</sup>*J*<sub>C-F</sub> = 270.0 Hz), 121.3, 69.2, 25.2; HRMS(ESI) for C<sub>10</sub>H<sub>8</sub>F<sub>6</sub>O [M-H]<sup>-</sup>, *m/z* calc.: 257.0401, found: 257.0414.

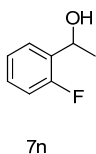

**1-(2-fluorophenyl)ethanol 7n<sup>8</sup>**: 319mg; 91% yield (S/C=1000); pale yellow liquid; <sup>1</sup>H NMR (400 MHz, CDCl<sub>3</sub>) δ 7.44 (m, 1H), 7.21 (m, 1H), 7.13 (m, 1H), 7.00 (m, 1H), 5.17 (d, *J* = 6.1 Hz, 1H), 2.32 (s, 1H), 1.48 (d, *J* = 6.4 Hz, 3H); <sup>13</sup>C NMR (101 MHz, CDCl<sub>3</sub>) δ 159.7 (d, <sup>1</sup>*J*<sub>C-F</sub> = 245.2 Hz), 132.7 (d, <sup>3</sup>*J*<sub>C-F</sub> = 13.3 Hz), 128.7 (d, <sup>4</sup>*J*<sub>C-F</sub> = 8.2 Hz), 126.6 (d, <sup>5</sup>*J*<sub>C-F</sub> = 4.6 Hz), 124.3 (d, <sup>6</sup>*J*<sub>C-F</sub> = 3.4 Hz), 115.3 (d, <sup>2</sup>*J*<sub>C-F</sub> = 21.8 Hz), 64.4, 24.0; MS(EI) for C<sub>8</sub>H<sub>9</sub>FO [M+H]<sup>+</sup>: 141. #

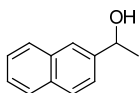

7o

**1-(Naphthalen-2-yl)ethanol 7o<sup>5</sup>**: 766mg; 89% yield (S/C=2000); pale yellow solid; <sup>1</sup>H NMR (300 MHz, CDCl<sub>3</sub>) δ (ppm): 7.77–7.71 (m, 4H), 7.44–7.41 (m, 3H), 4.94 (dd, *J* = 12.9, 6.4 Hz, 1H), 2.41 (s, 1H), 1.56 (d, 3H). <sup>13</sup>C NMR (75 MHz, CDCl<sub>3</sub>) δ 143.29, 133.40, 132.97, 128.30, 127.99, 127.72, 126.15, 125.80, 123.90, 123.85, 70.45, 25.12; MS(EI) for C<sub>12</sub>H<sub>12</sub>O [M+H]<sup>+</sup>: 173.

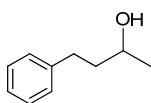

7p

**4-Phenylbutan-2-ol 7p<sup>8</sup>**: 364mg; 97% yield, (S/C=1000); pale yellow solid; <sup>1</sup>H NMR (400 MHz, CDCl<sub>3</sub>) δ (ppm): 7.31 (m, 2H), 7.22 (m, 3H), 3.83 (dt, *J* = 12.3, 6.2 Hz, 1H), 2.73 (m, 2H), 1.80 (m, 3H), 1.25 (d, *J* = 6.2 Hz, 3H); <sup>13</sup>C NMR (101 MHz, CDCl<sub>3</sub>) δ (ppm): 142.1, 128.4, 125.8, 67.5, 40.9, 32.2, 23.6; MS(EI) for C<sub>10</sub>H<sub>14</sub>O [M+H]<sup>+</sup>: 151.

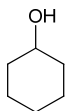

7q

**Cyclohexanol 7q<sup>7</sup>**: 100% conversion (S/C=2000), GC retention time: 5.90 min; colorless liquid; <sup>1</sup>H NMR (400 MHz, CDCl<sub>3</sub>) δ (ppm): 3.61-3.56 (m, 1H), 2.10-2.09 (m, 1H), 1.86-1.85 (m, 2H), 1.71-1.69 (m, 2H), 1.52-1.51 (m, 1H), 1.25-1.12 (m, 5H); <sup>13</sup>C NMR (101 MHz, CDCl<sub>3</sub>) δ (ppm) 70.3, 35.5, 25.4, 25.1; MS(EI) for C<sub>6</sub>H<sub>12</sub>O [M+H]<sup>+</sup>: 101.

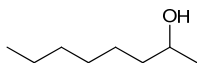

7r

**octan-2-ol 7r<sup>10</sup>**: 100% conversion (S/C=2000), GC retention time: 6.65 min; colorless liquid; <sup>1</sup>H NMR (400 MHz, CDCl<sub>3</sub>) δ (ppm): 3.77-3.75 (m, 1H), 1.54 (s, 1H), 1.41-1.15 (m, 12H), 0.87-0.84 (m, 3H); <sup>13</sup>C NMR (101 MHz, CDCl<sub>3</sub>) δ (ppm) 68.1, 39.4, 31.8, 29.3, 25.7, 23.4, 22.6, 14.1; MS(EI) for C<sub>8</sub>H<sub>18</sub>O [M+H]<sup>+</sup>: 131.

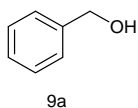

**Phenyl methanol 9a<sup>11</sup>**: 515mg; 95% yield (S/C=2000); pale yellow liquid; <sup>1</sup>H NMR (300 MHz, CDCl<sub>3</sub>) δ (ppm): 7.30-7.21 (m, 5H), 4.57 (s, 2H), 2.70 (brs, 1H); <sup>13</sup>C NMR (75 MHz, CDCl<sub>3</sub>) δ (ppm): 141.0, 128.5, 127.5, 127.0, 64.9; MS(EI) for C<sub>7</sub>H<sub>8</sub>O [M+H]<sup>+</sup>: 109.

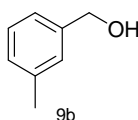

**m-Tolylmethanol 9b<sup>11</sup>**: 240mg; 79% yield (S/C=1000); pale yellow liquid; <sup>1</sup>H NMR (300 MHz, CDCl<sub>3</sub>) δ (ppm): 7.23-7.08 (m, 4H), 4.60 (s, 2H), 2.34 (s, 3H), 2.10 (s, 1H); <sup>13</sup>C NMR (75 MHz, CDCl<sub>3</sub>) δ (ppm): 141.0, 138.2, 128.4, 128.3, 127.8, 124.1, 65.2, 65.1, 21.4; MS(EI) for C<sub>8</sub>H<sub>10</sub>O [M+H]<sup>+</sup>: 123.

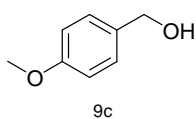

**(4-Methoxyphenyl)methanol 9c<sup>11</sup>**: 250mg; 73% yield (S/C=1000); pale yellow liquid; <sup>1</sup>H NMR (300 MHz, CDCl<sub>3</sub>) δ (ppm): 7.27 (d, *J* = 8.4 Hz, 2H), 6.88 (d, *J* = 8.4 Hz, 2H), 4.58 (s, 2H), 3.79 (s, 3H), 1.92 (s, 1H); <sup>13</sup>C NMR (75 MHz, CDCl<sub>3</sub>) δ (ppm): 159.2, 133.3, 128.6, 114.0, 64.8, 55.3; MS(EI) for C<sub>8</sub>H<sub>10</sub>O<sub>2</sub> [M+H]<sup>+</sup>: 139.

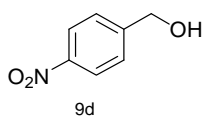

**(4-Nitrophenyl)methanol 9d<sup>11</sup>**: 285mg; 75% yield (S/C=1000); yellow solid; <sup>1</sup>H NMR (300 MHz, CDCl<sub>3</sub>) δ (ppm): 8.22 (d, *J* = 8.5 Hz, 2H), 7.54 (d, *J* = 8.3 Hz, 2H), 4.84 (d, *J* = 5.4 Hz, 2H), 1.98 (d, *J* = 6.0 Hz, 1H); <sup>13</sup>C NMR (75 MHz, CDCl<sub>3</sub>) δ (ppm): 148.3, 147.3, 127.0, 123.7, 64.0; MS(EI) for C<sub>7</sub>H<sub>7</sub>NO<sub>3</sub> [M+H]<sup>+</sup>: 154.

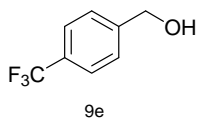

**(4-(Trifluoromethyl)phenyl)methanol 9e<sup>11</sup>**: 408mg; 93% yield (S/C=1000); pale yellow liquid; <sup>1</sup>H NMR (300 MHz, CDCl<sub>3</sub>) δ (ppm): 7.61 (d, *J* = 7.8 Hz, 2H), 7.47 (d, *J* = 7.6 Hz, 2H), 4.76 (s, 2H), 1.95 (s, 1H); <sup>13</sup>C NMR (75 MHz, CDCl<sub>3</sub>) δ (ppm): 144.7, 129.6 (q, <sup>2</sup>*J*<sub>C-F</sub> = 32.0 Hz), 126.8, 125.4, 124.2 (q, <sup>1</sup>*J*<sub>C-F</sub> = 270.0 Hz), 64.3; HRMS(ESI) for C<sub>8</sub>H<sub>7</sub>F<sub>3</sub>O [M-H]<sup>-</sup>, *m/z* calc.: 175.0371, found: 175.0375.

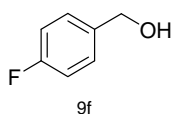

**(4-Fluorophenyl)methanol 9f<sup>11</sup>**: 590mg; 94% yield (S/C=2000); pale yellow solid; <sup>1</sup>H NMR (300 MHz, CDCl<sub>3</sub>) δ (ppm): 7.31-7.27 (m, 2H), 7.05-6.99 (m, 2H), 4.60 (s, 2H), 2.28 (s, 1H); <sup>13</sup>C NMR (75 MHz, CDCl<sub>3</sub>) δ (ppm): 162.3 (d, <sup>1</sup>*J*<sub>C-F</sub> = 243.8 Hz), 128.7 (d, <sup>3</sup>*J*<sub>C-F</sub> = 8.3 Hz), 115.3 (d, <sup>2</sup>*J*<sub>C-F</sub> = 21.8 Hz), 64.5; MS(EI) for C<sub>7</sub>H<sub>7</sub>FO [M+H]<sup>+</sup>:127.

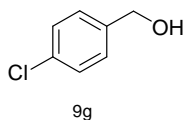

**(4-Chlorophenyl)methanol 9g<sup>11</sup>**: 285mg; 80% yield (S/C=1000); pale yellow solid; <sup>1</sup>H NMR (300 MHz, CDCl<sub>3</sub>) δ (ppm): 7.33-7.26 (m, 4H), 4.64 (s, 2H), 1.95 (s, 1H); <sup>13</sup>C NMR (75 MHz, CDCl<sub>3</sub>) δ (ppm): 139.3, 133.3, 128.7, 128.3, 64.4; MS(EI) for C<sub>7</sub>H<sub>7</sub>ClO [M+H]<sup>+</sup>: 143.

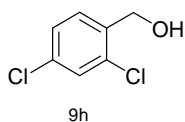

**(2,4-Dichlorophenyl)methanol 9h<sup>12</sup>**: 273mg; 62% yield (S/C=1000); pale yellow solid; <sup>1</sup>H NMR (300 MHz, CDCl<sub>3</sub>) δ (ppm): 7.35 (d, *J* = 8.3 Hz, 2H), 7.21 (d, *J* = 8.0 Hz, 1H), 4.72 (s, 2H), 2.28 (s, 1H). <sup>13</sup>C NMR (75 MHz, CDCl<sub>3</sub>) δ 136.73, 133.78, 133.11, 129.29, 129.07, 127.21, 61.91; MS(EI) for C<sub>7</sub>H<sub>6</sub>Cl<sub>2</sub>O [M+H]<sup>+</sup>:177.

## 8. References

1. J. S. M. Samec and J. E. Backvall, *Chem. Eur. J.*, 2002, **8**, 2955-2961.
2. R. G. Ball, W. A. G. Graham, D. M. Heinekey, J. K. Hoyano, A. D. McMaster, B. M. Mattson and S. T. Michel, *Inorg. Chem.*, 1990, **29**, 2023-2025.
3. D. L. Davies, O. Al-Duaij, J. Fawcett, M. Giardiello, S. T. Hilton and D. R. Russell, *Dalton Trans.*, 2003, 4132-4138.
4. C. Wang, A. Pettman, J. Bacsá and J. L. Xiao, *Angew. Chem. Int. Ed.*, 2010, **49**, 7948-7552.
5. C. Azerraf and D. Gelman, *Chem. Eur. J.*, 2008, **14**, 10364-10368.
6. I. P. Query, P. A. Squier, E. M. Larson, N. A. Isley and T. B. Clark, *J. Org. Chem.*, 2011, **76**, 6452-6456.
7. T. Zweifel, J. -V. Naubron, T. Büttner, T. Ott and H. Grützmacher, *Angew. Chem. Int. Ed.*, 2008, **47**, 3245-3249.
8. E. Buitrago, F. Tinnis and H. Adolfsson, *Adv. Synth. Catal.*, 2012, **354**, 217-222.
9. J. Q. Yu, H. C. Wu, C. Ramarao, J. B. Spencer and St. V. Ley, *Chem. Commun.*, 2003, 678-679.
10. A. M. Tondreau, E. Lobkovsky and P. J. Chirik, *Org. Lett.*, 2008, **10**, 2789-2792.
11. X. F. Wu and J. L. Xiao, *Chem. Commun.*, 2007, 2449-2466.
12. N. Azizi, E. Batebi, S. Bagherpour and H. Ghafari, *RSC Adv.*, 2012, **2**, 2289-2293.

## 9. Traces of $^1\text{H}$ NMR and $^{13}\text{C}$ NMR spectra

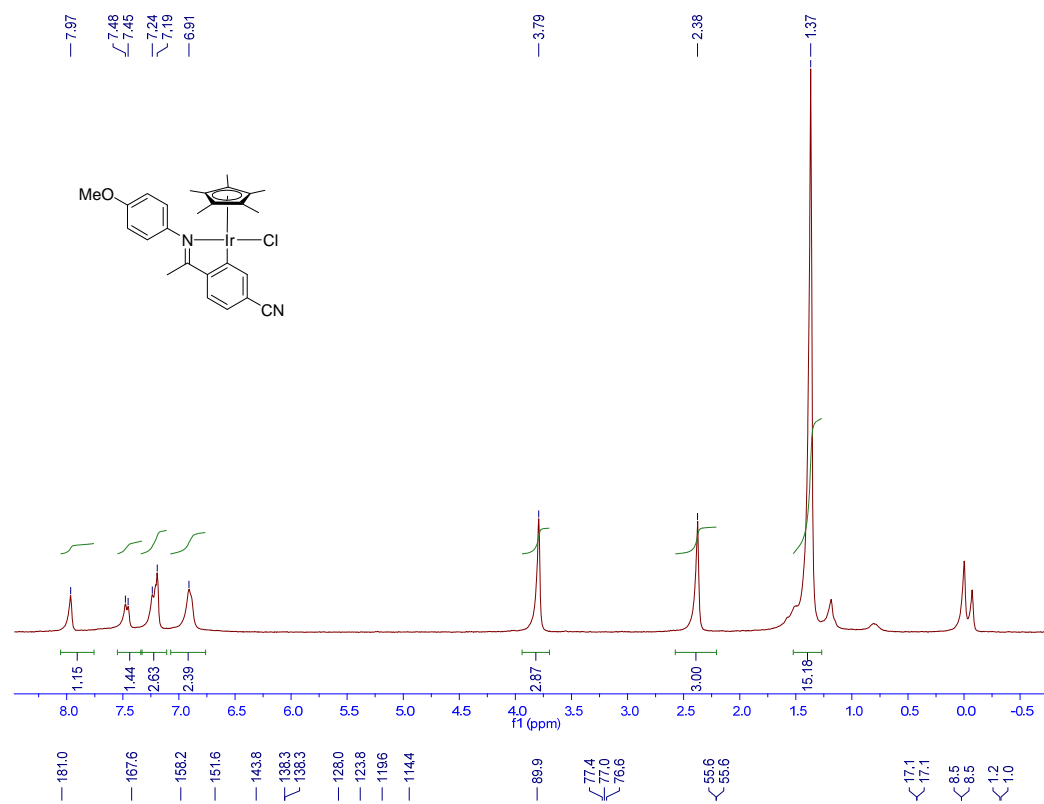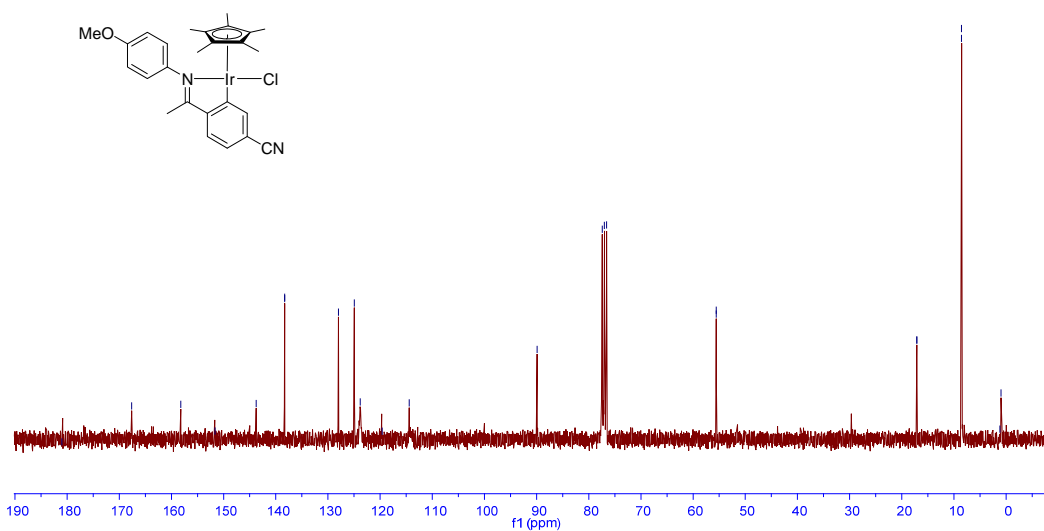

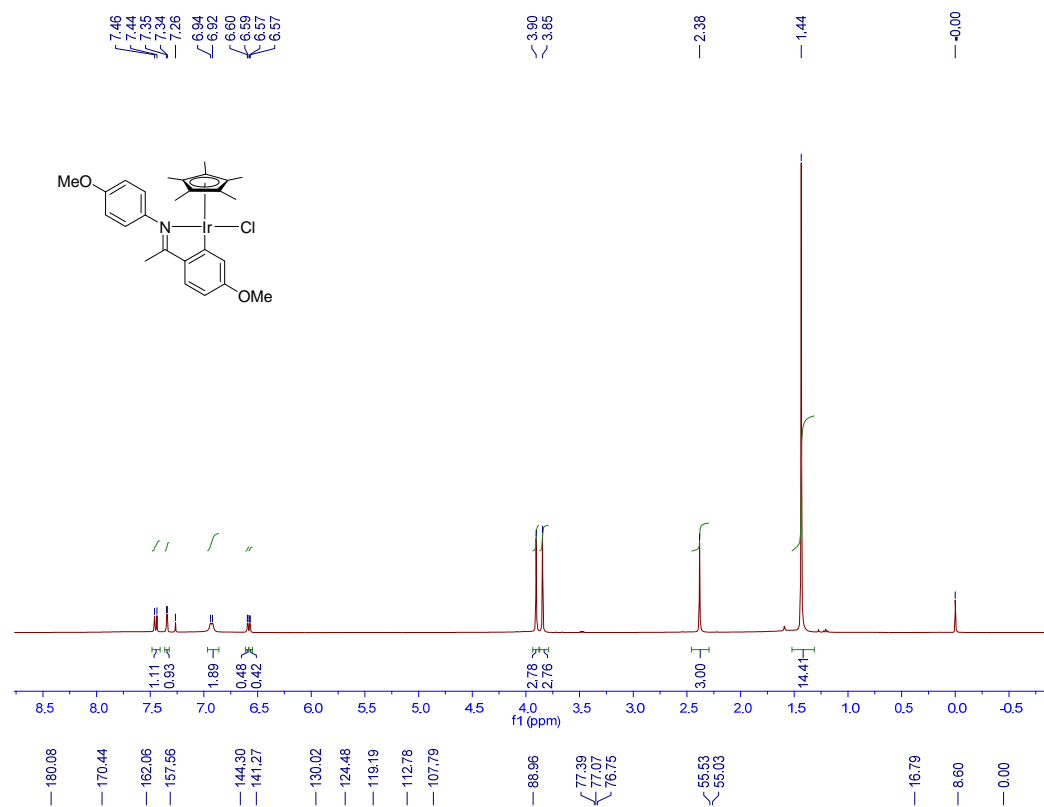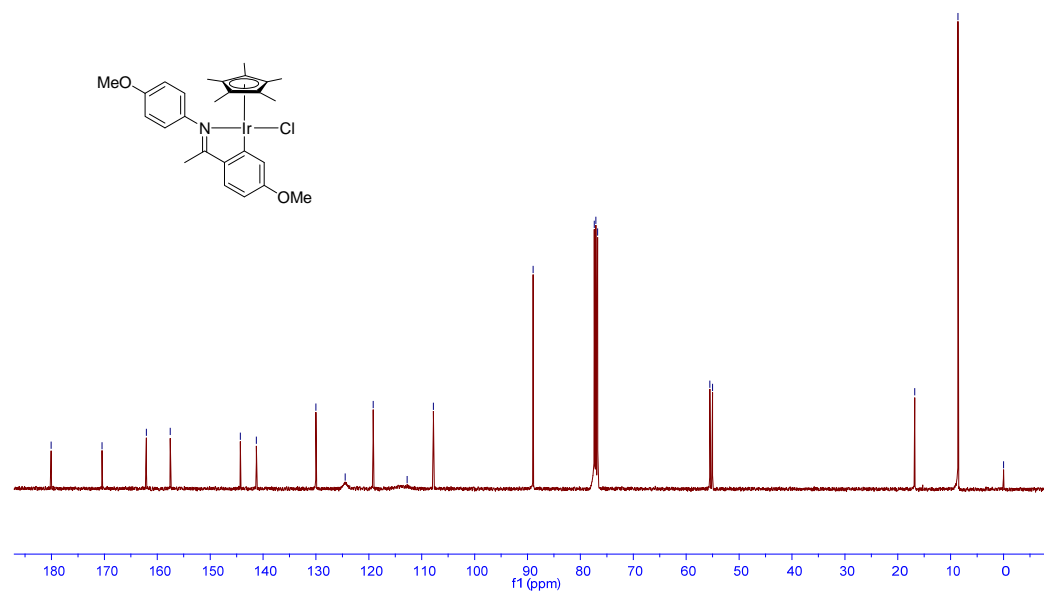



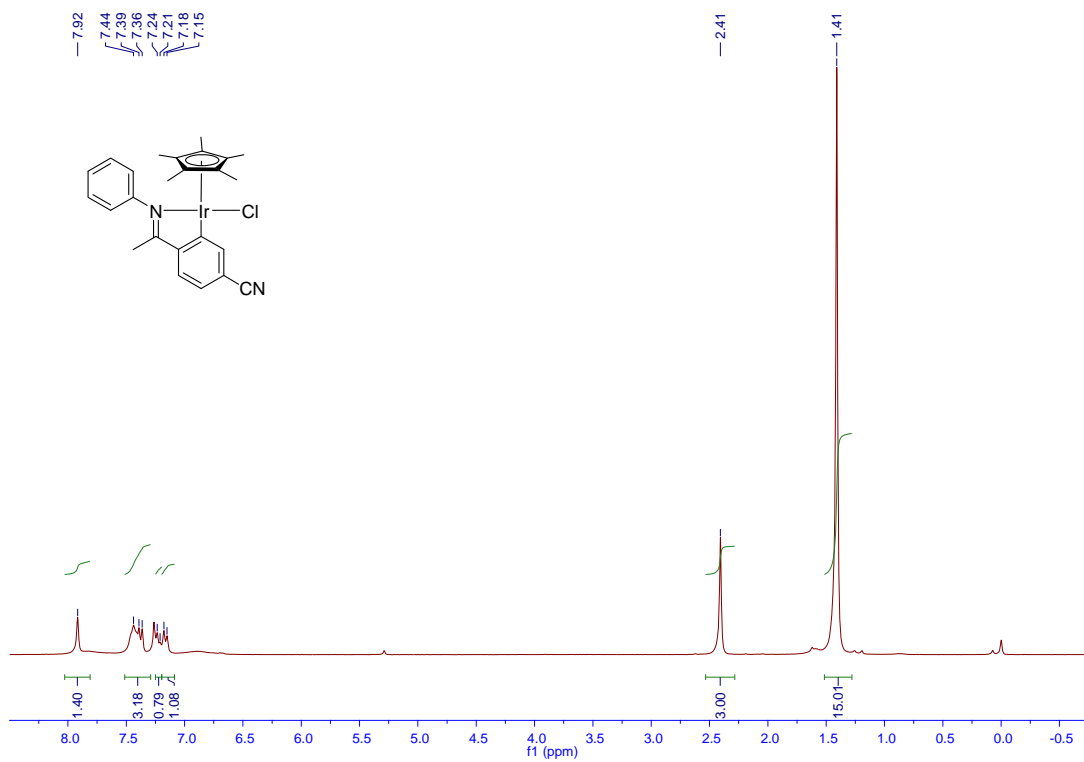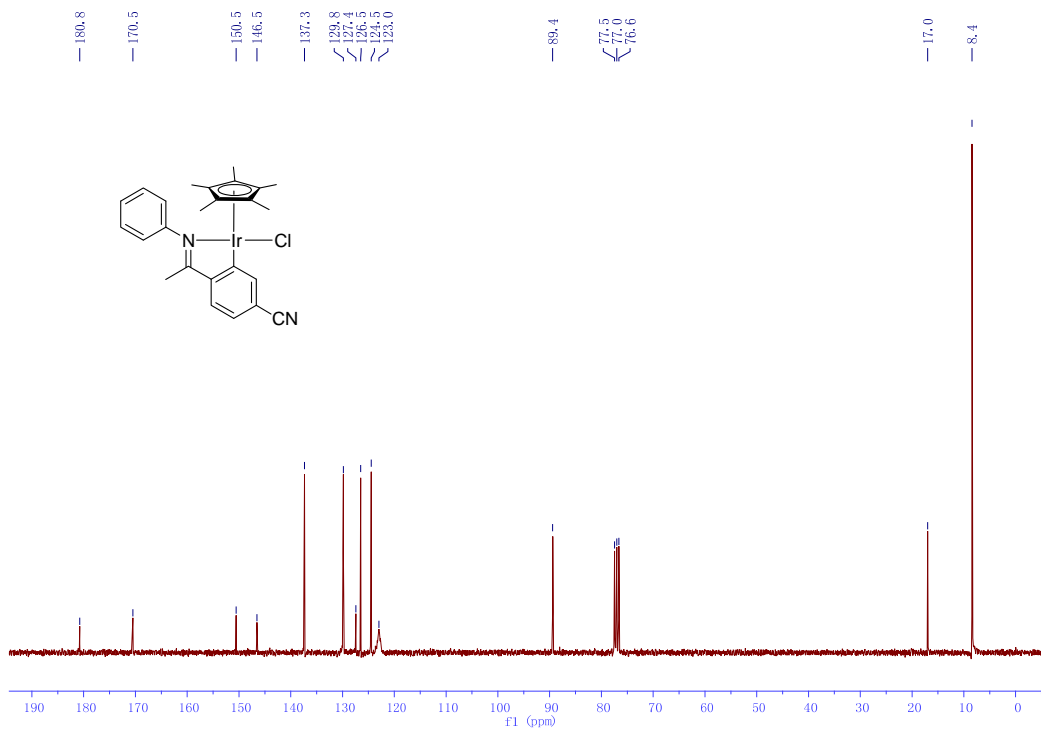

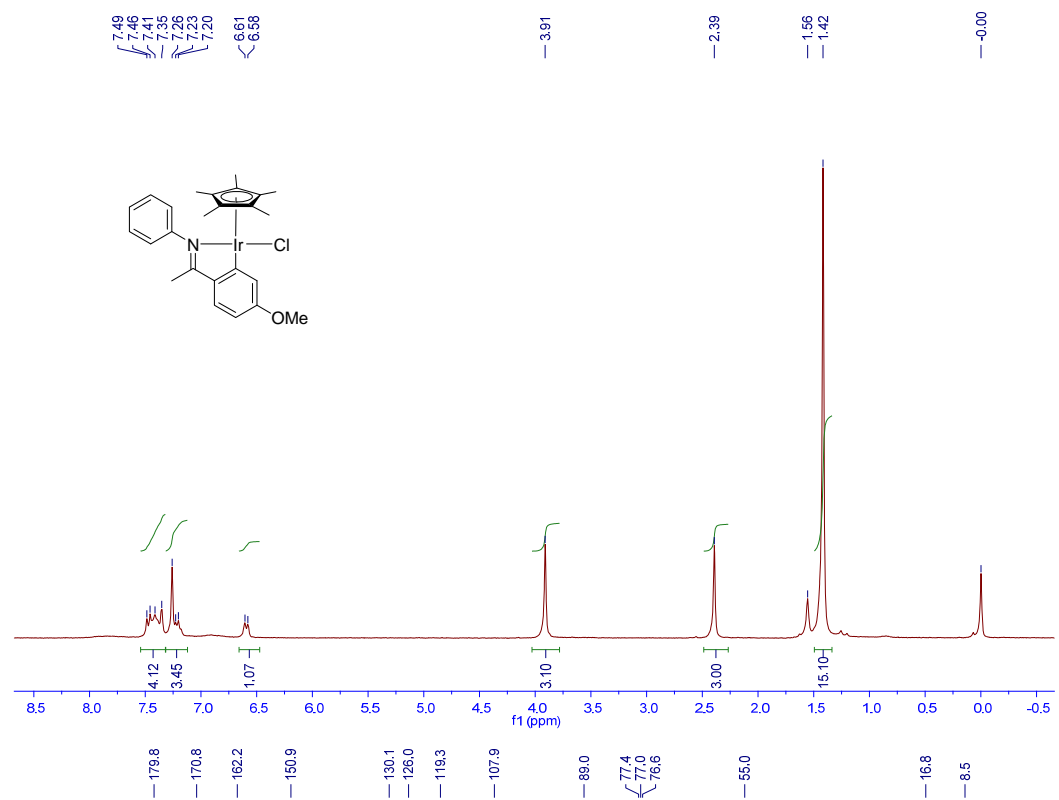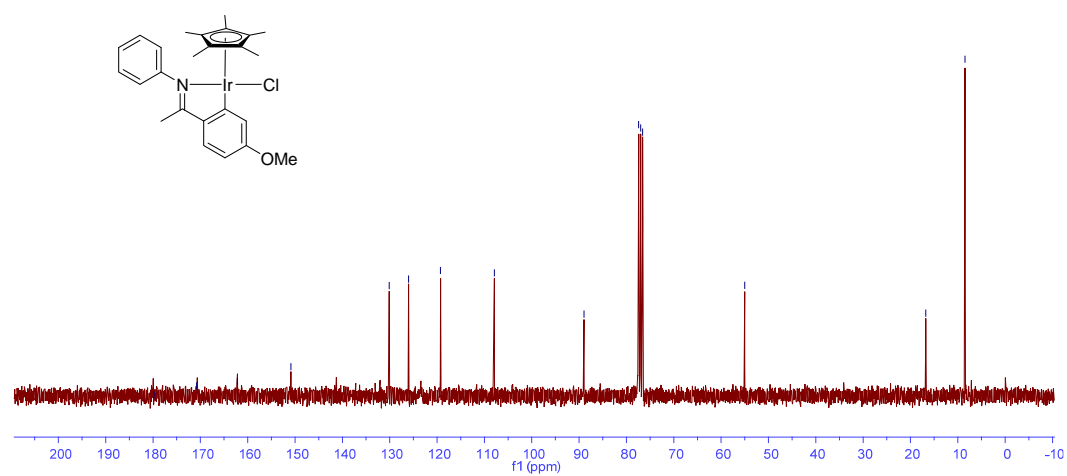

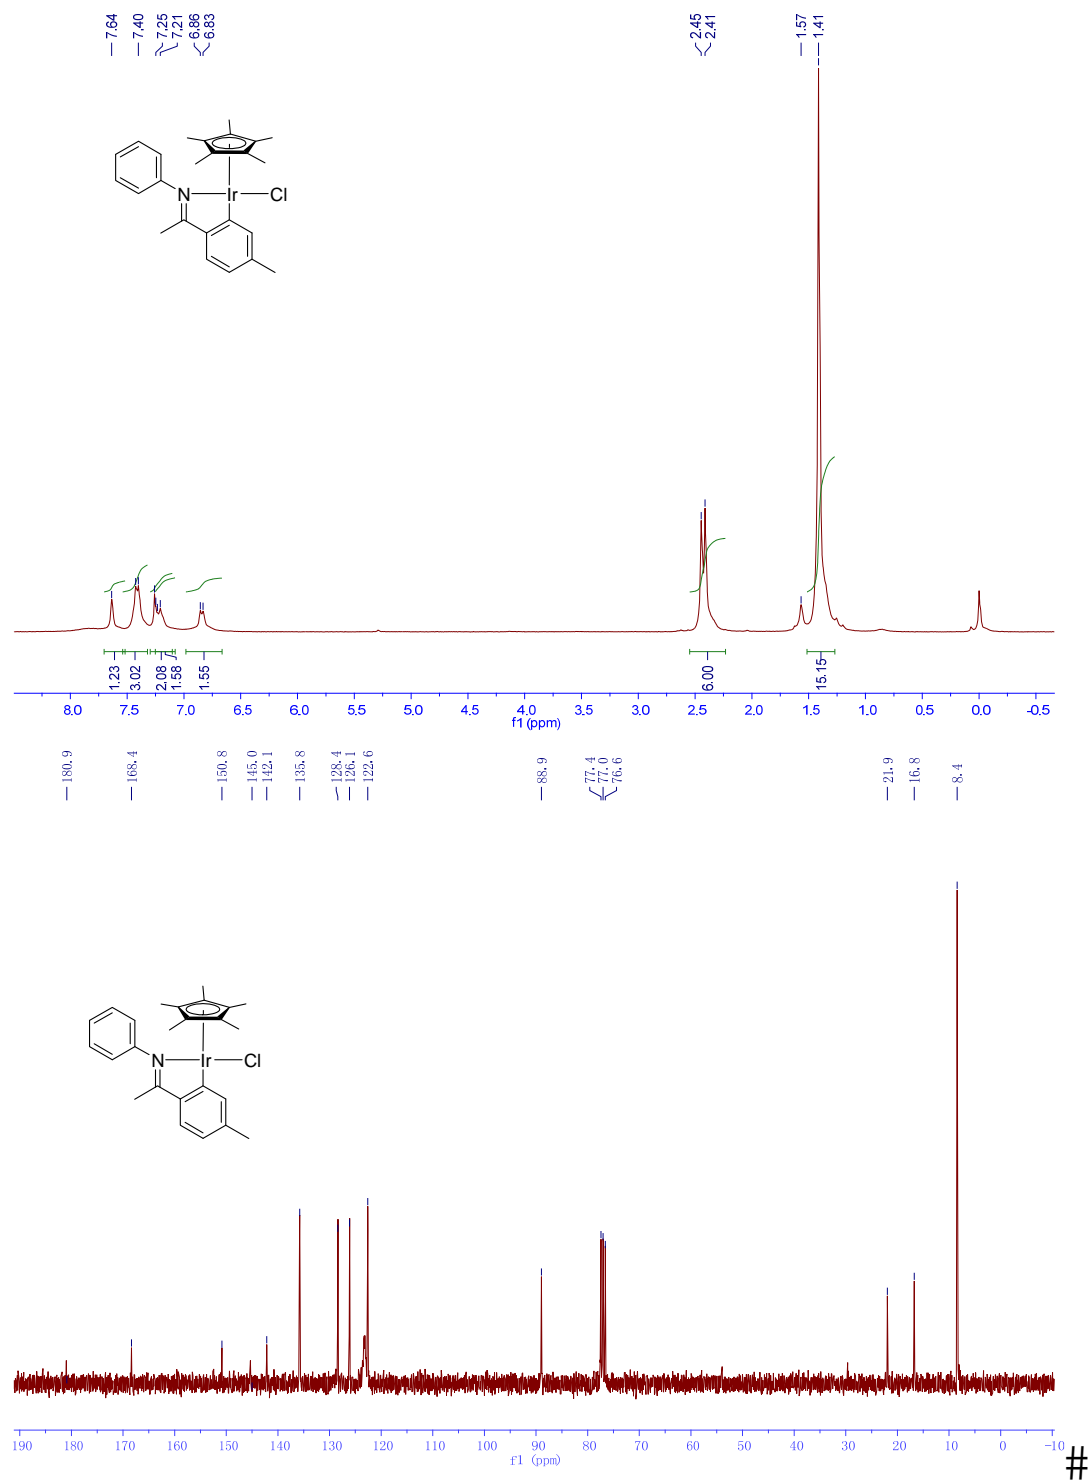

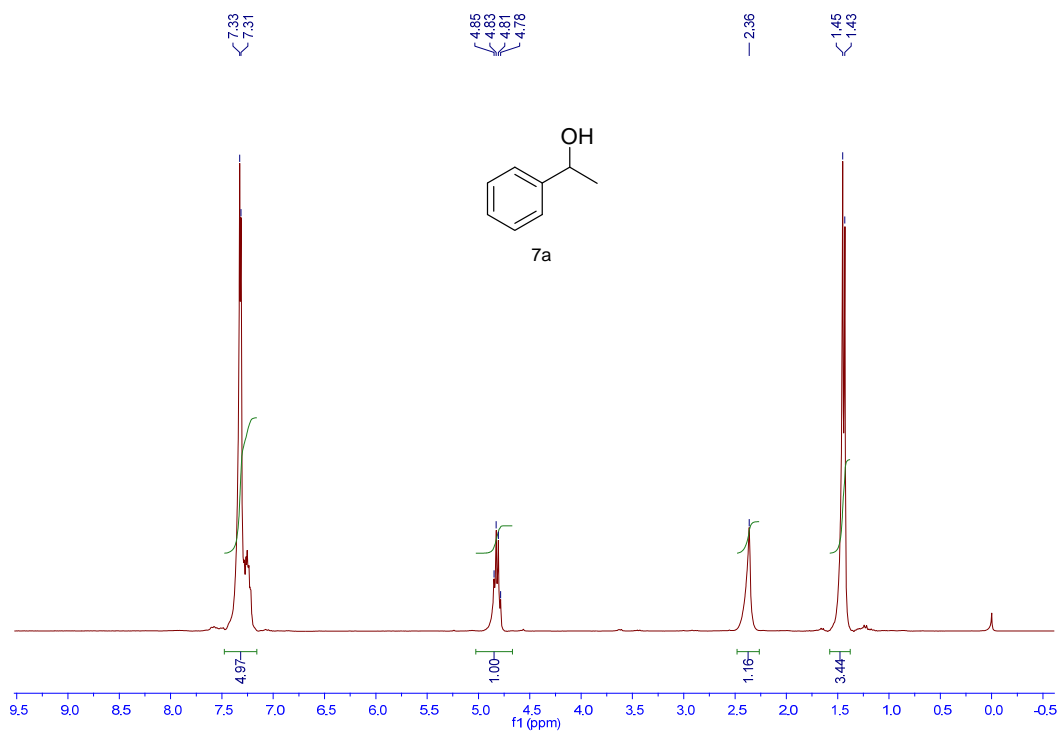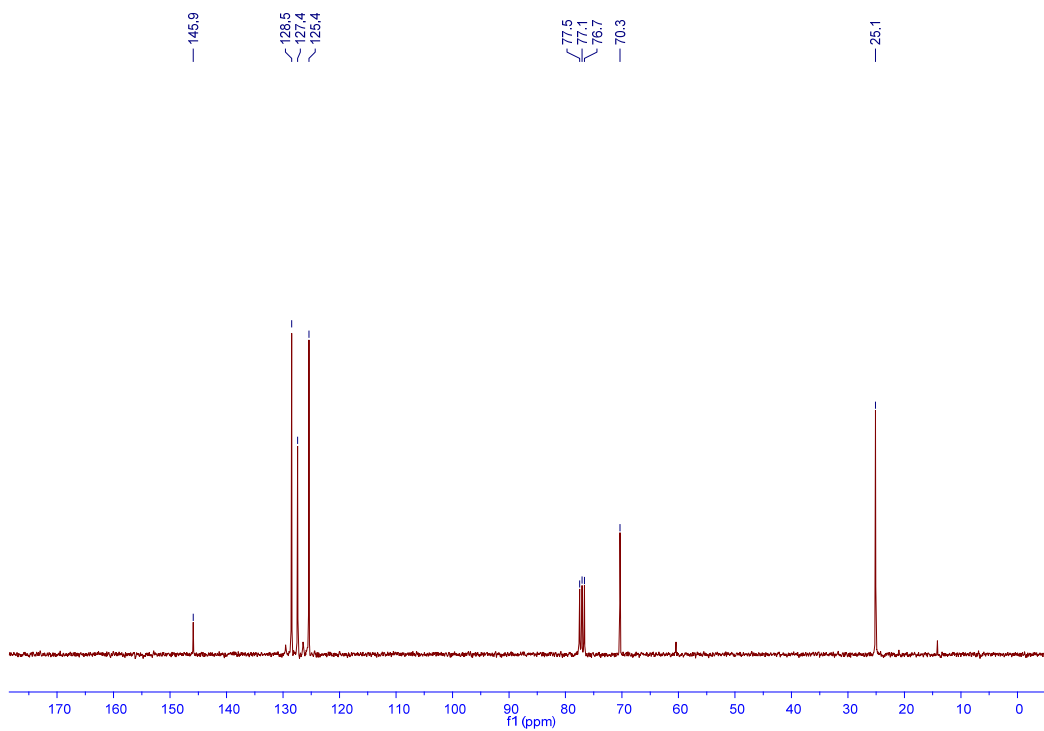

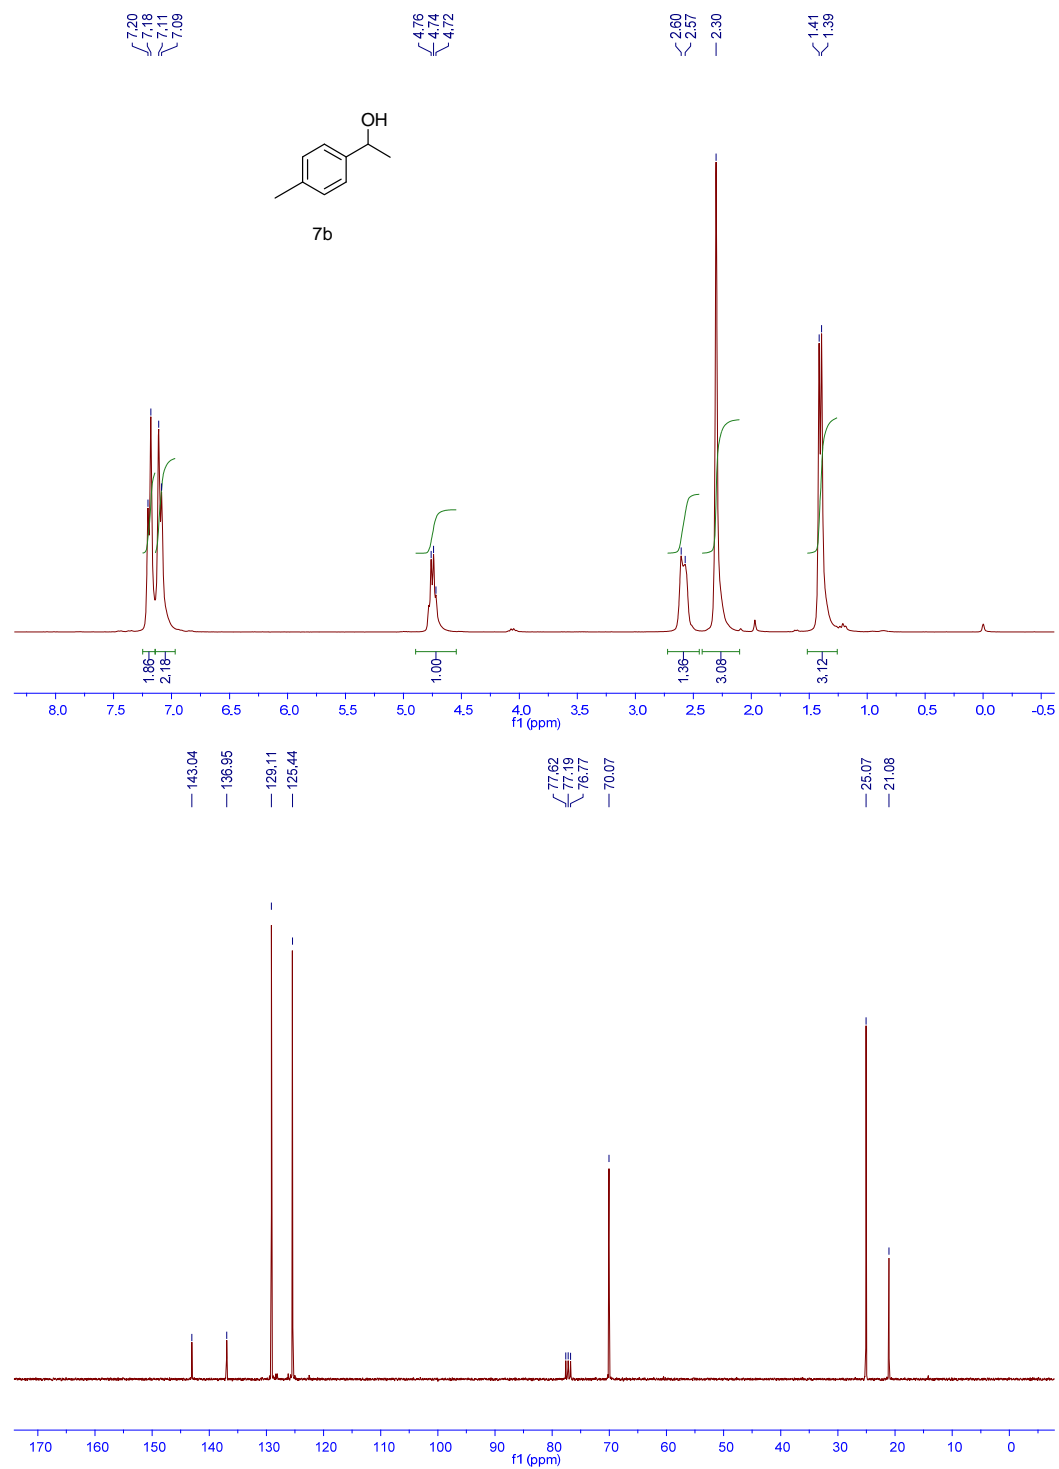

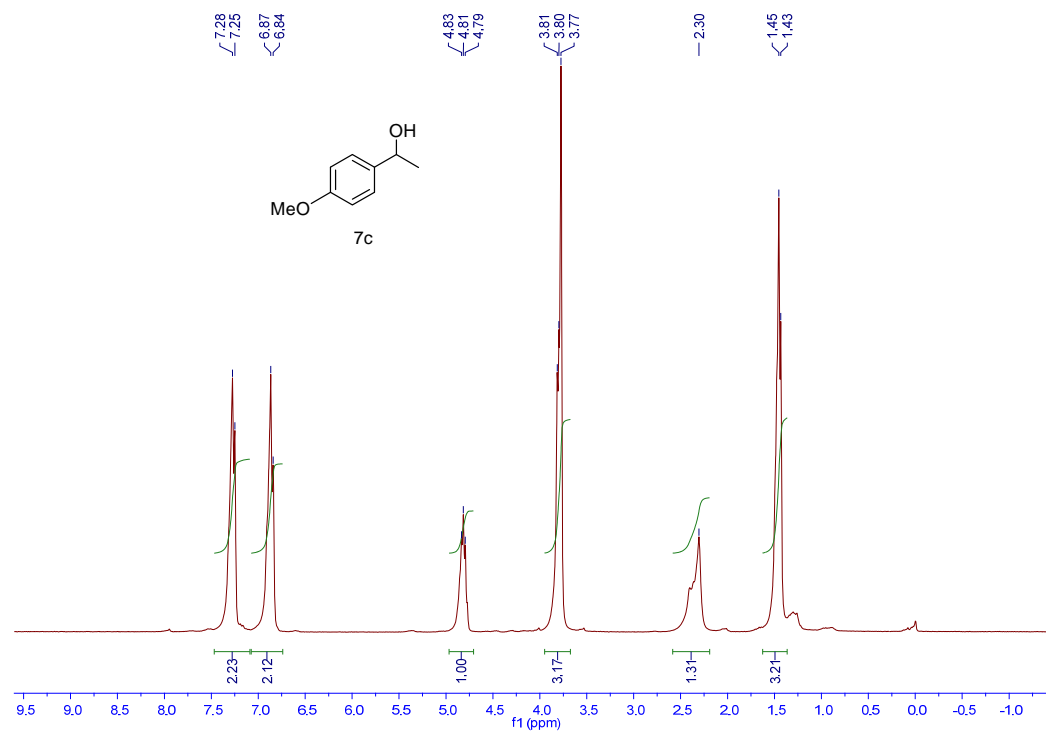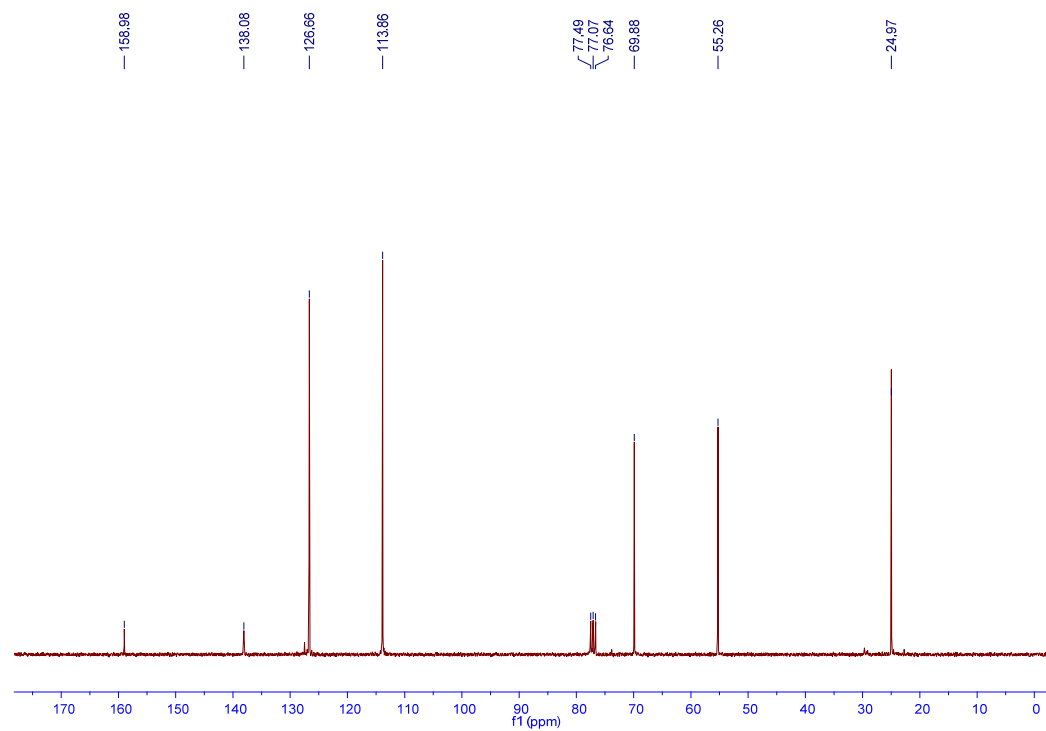

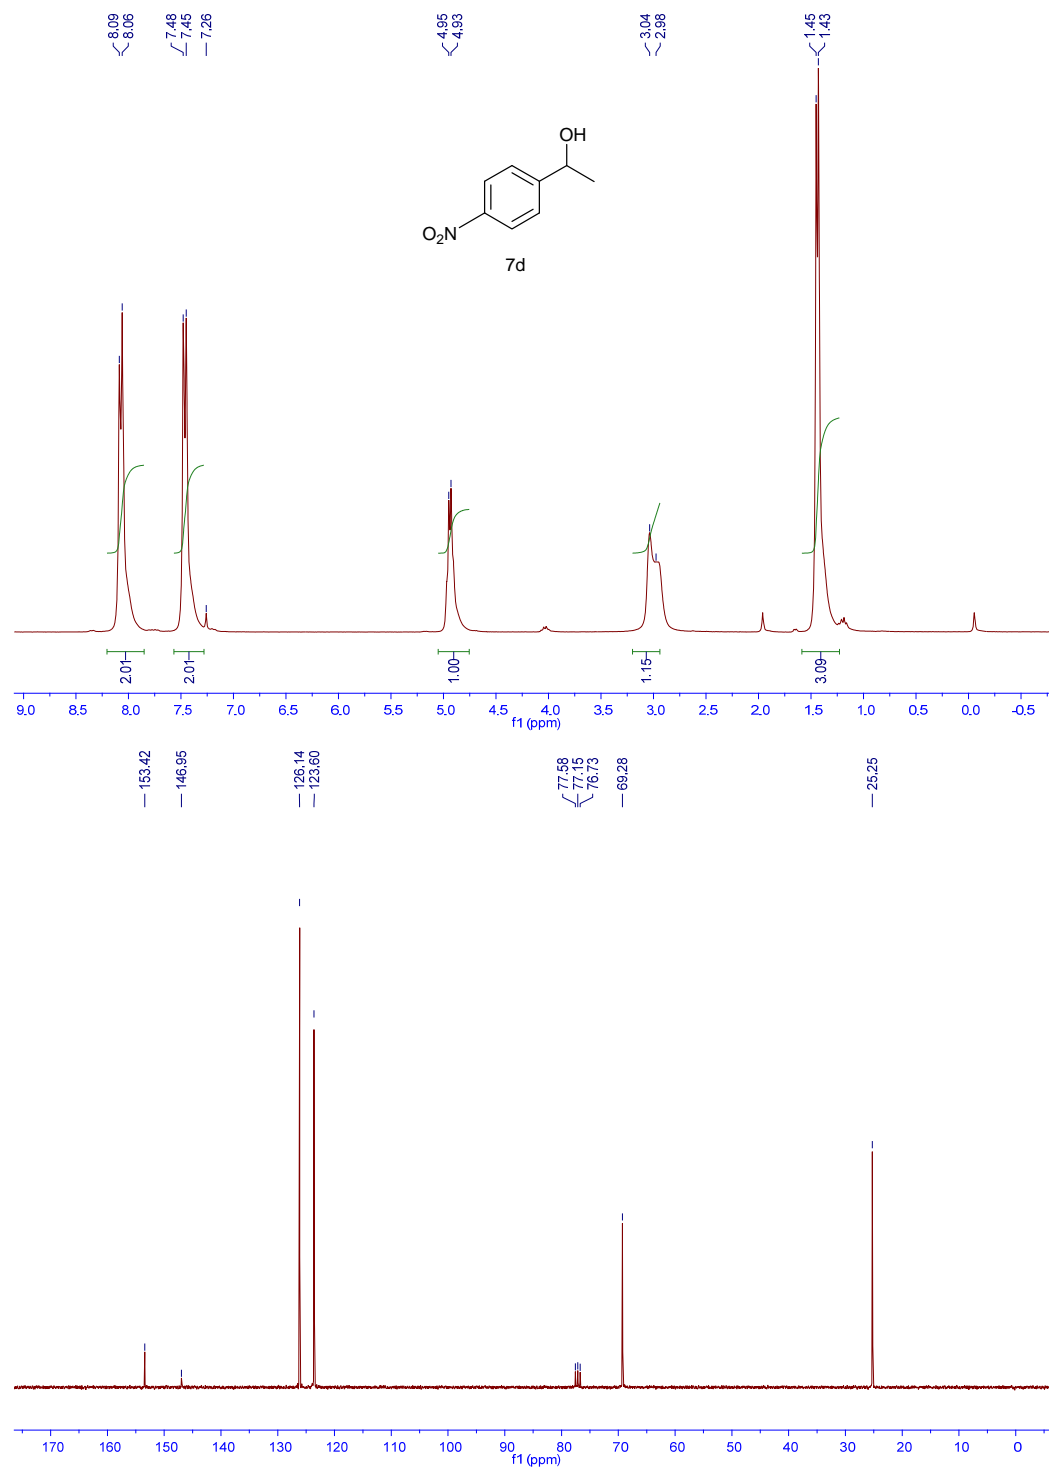

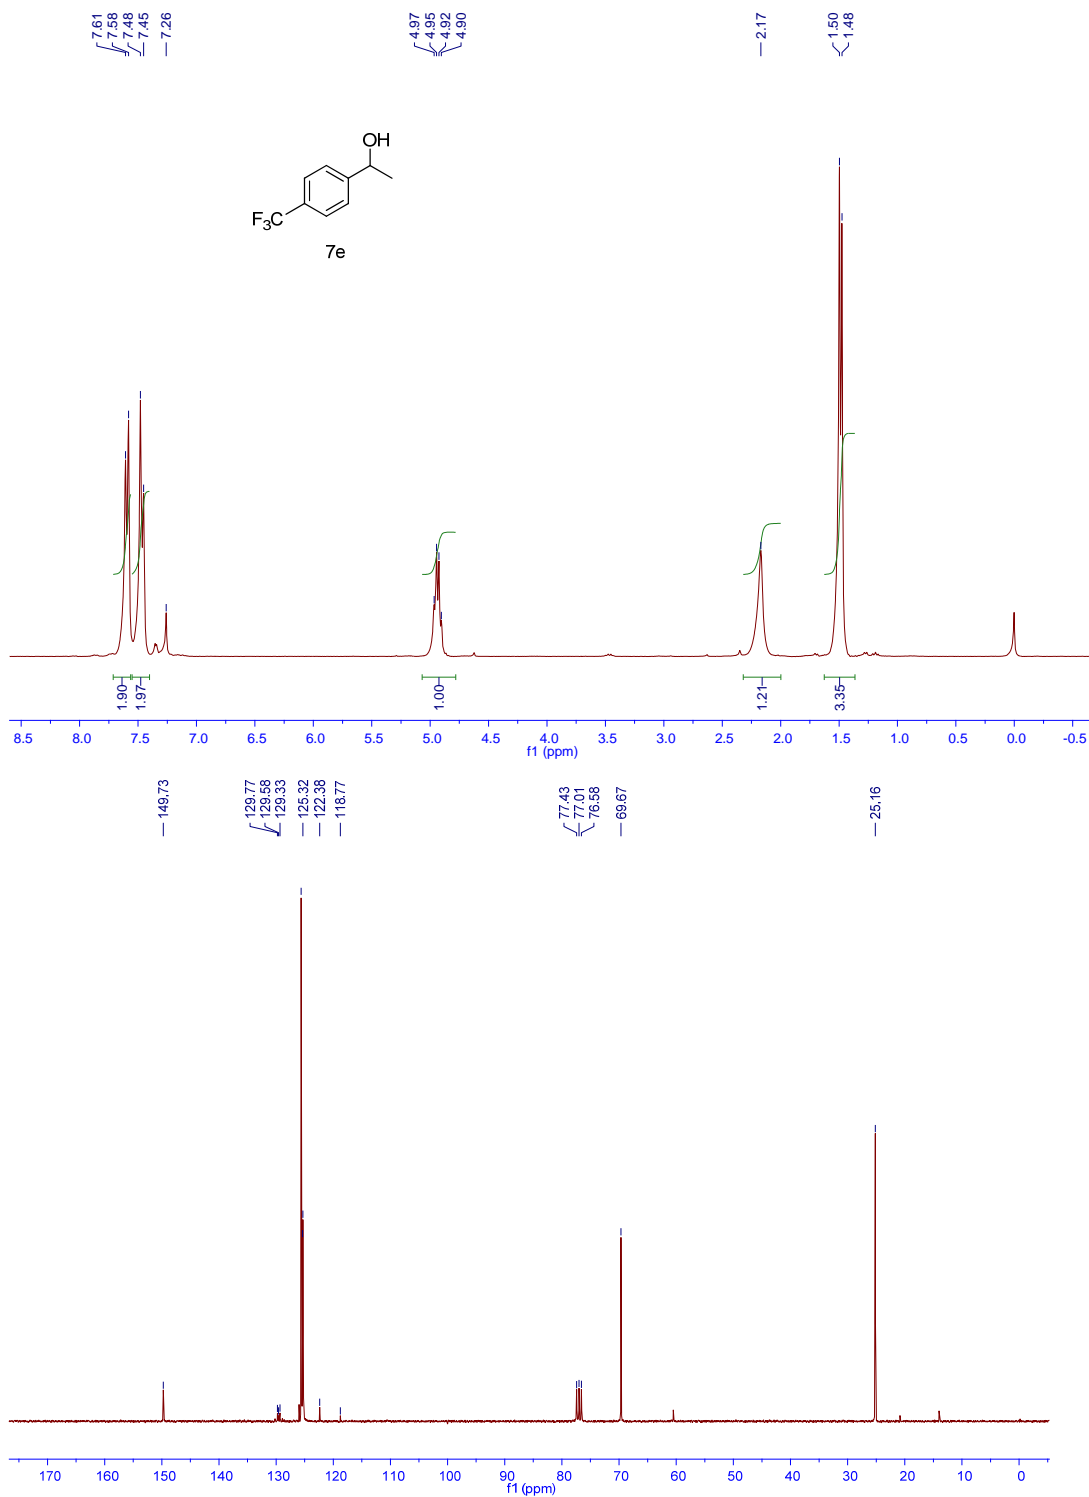



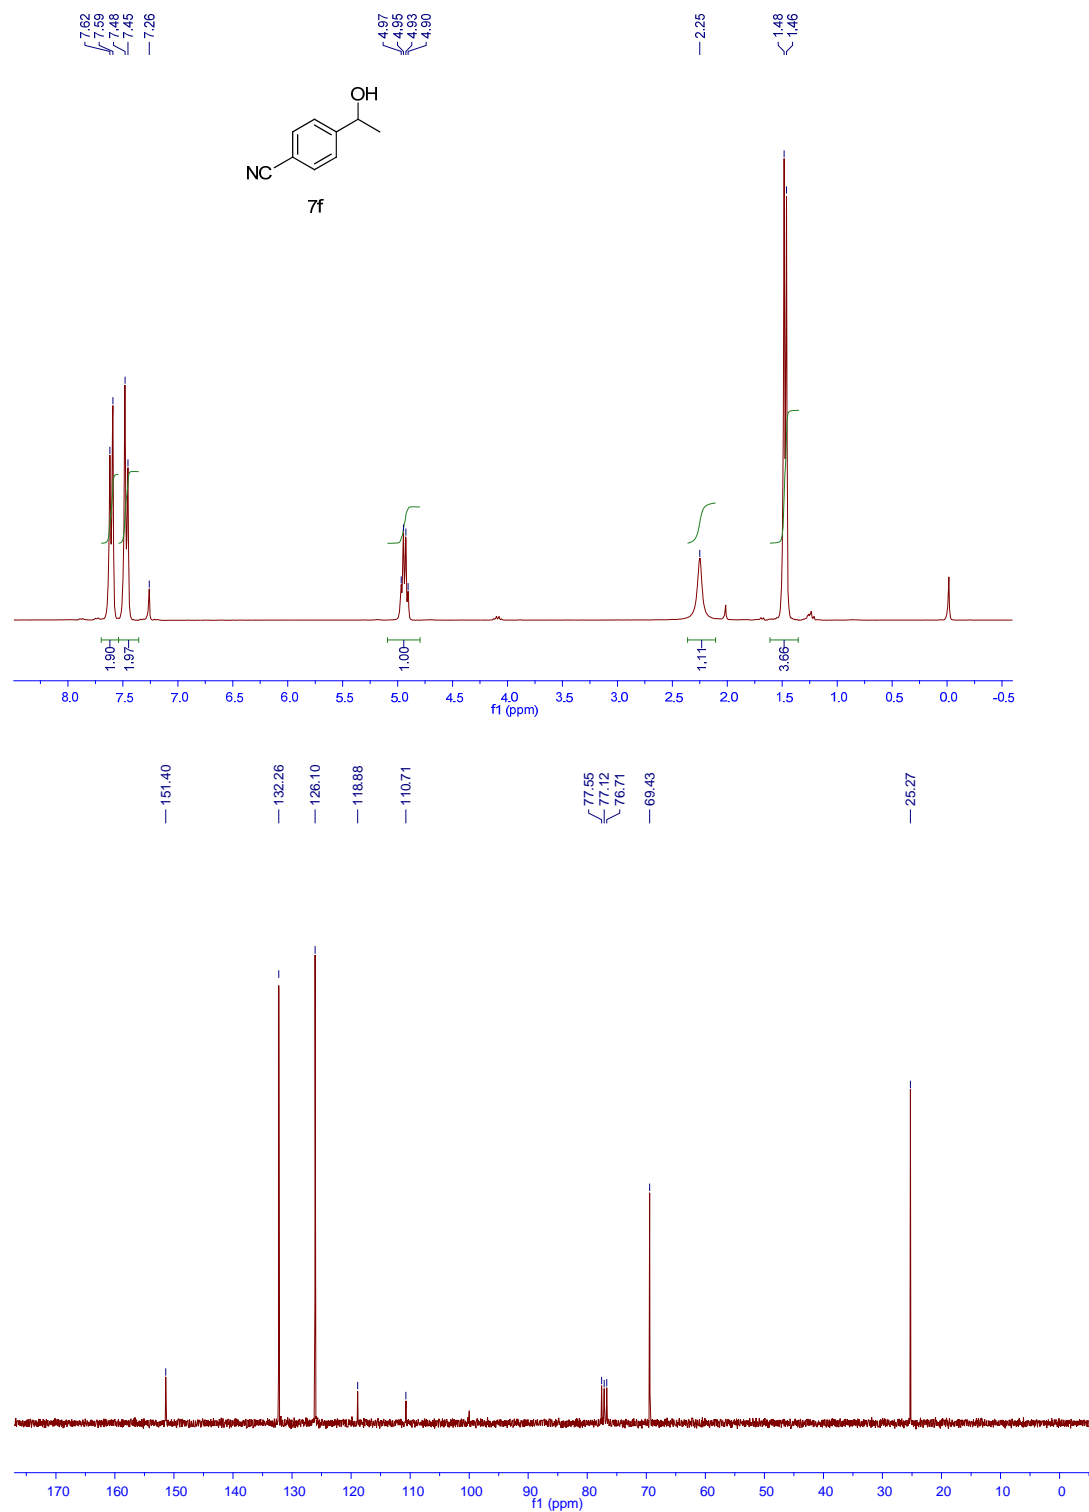

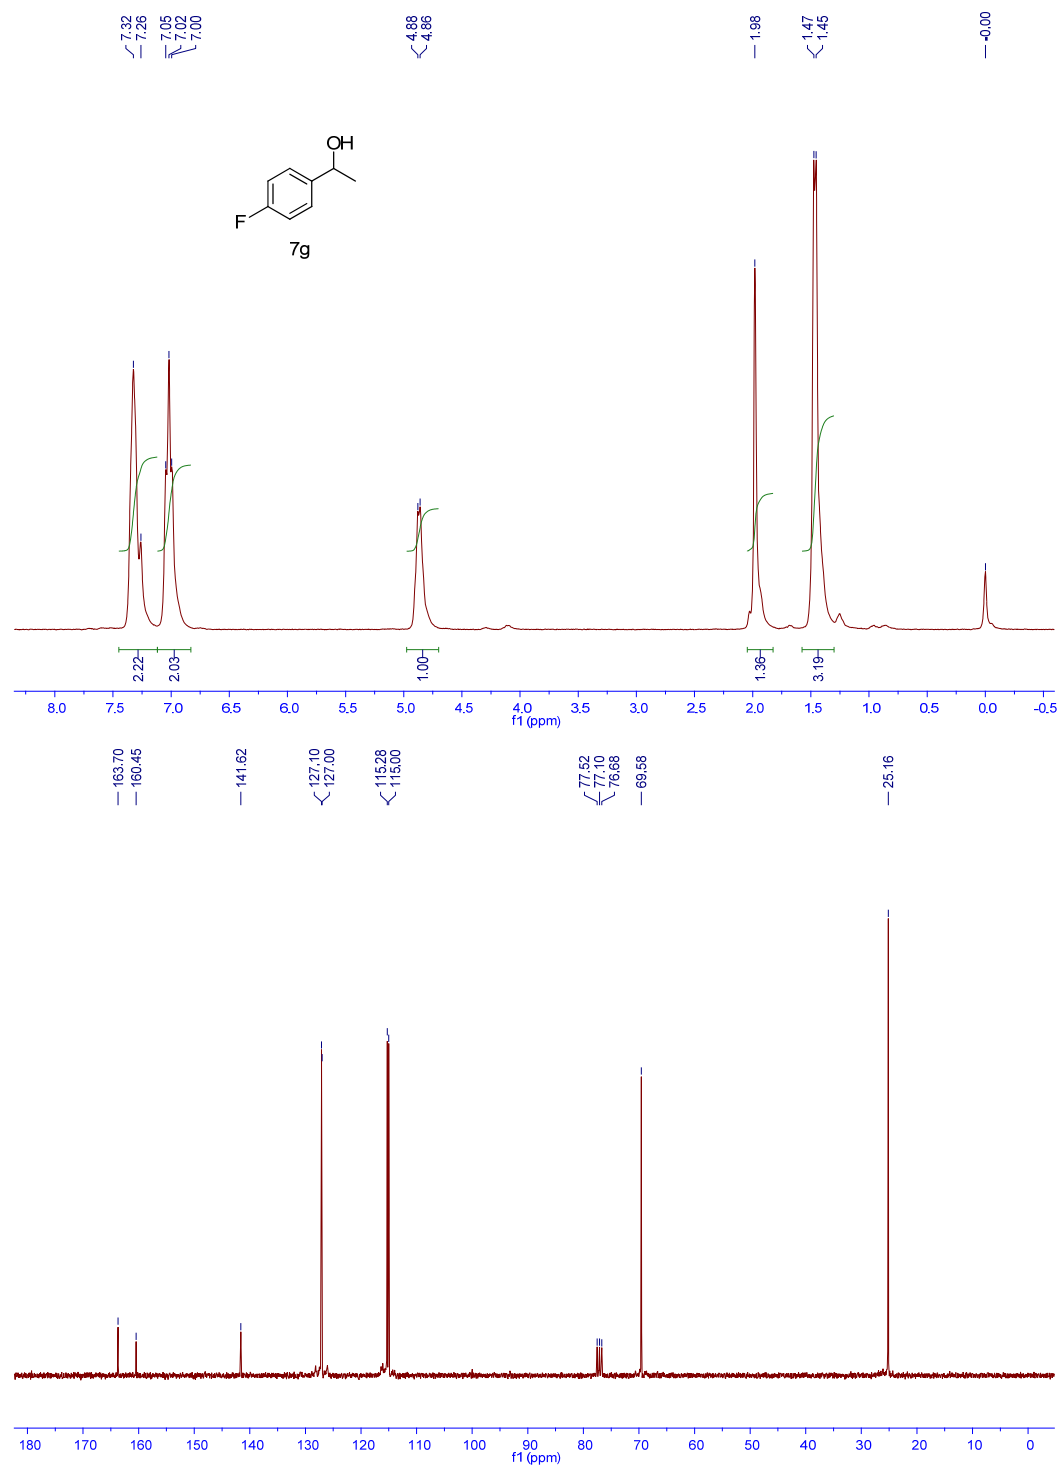

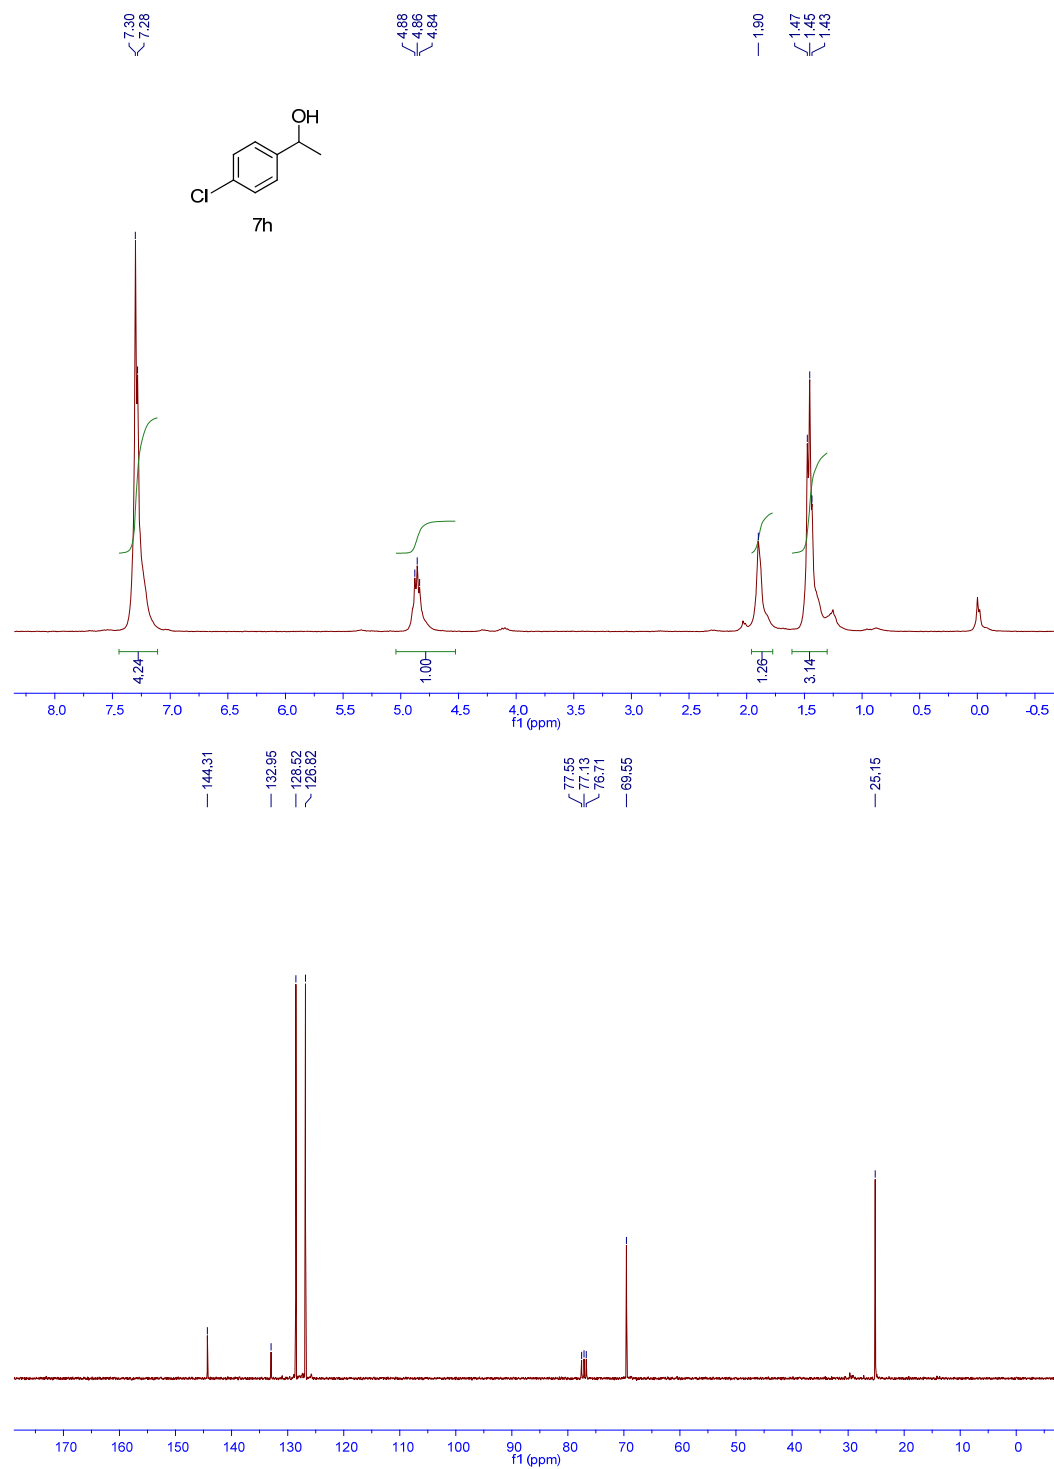

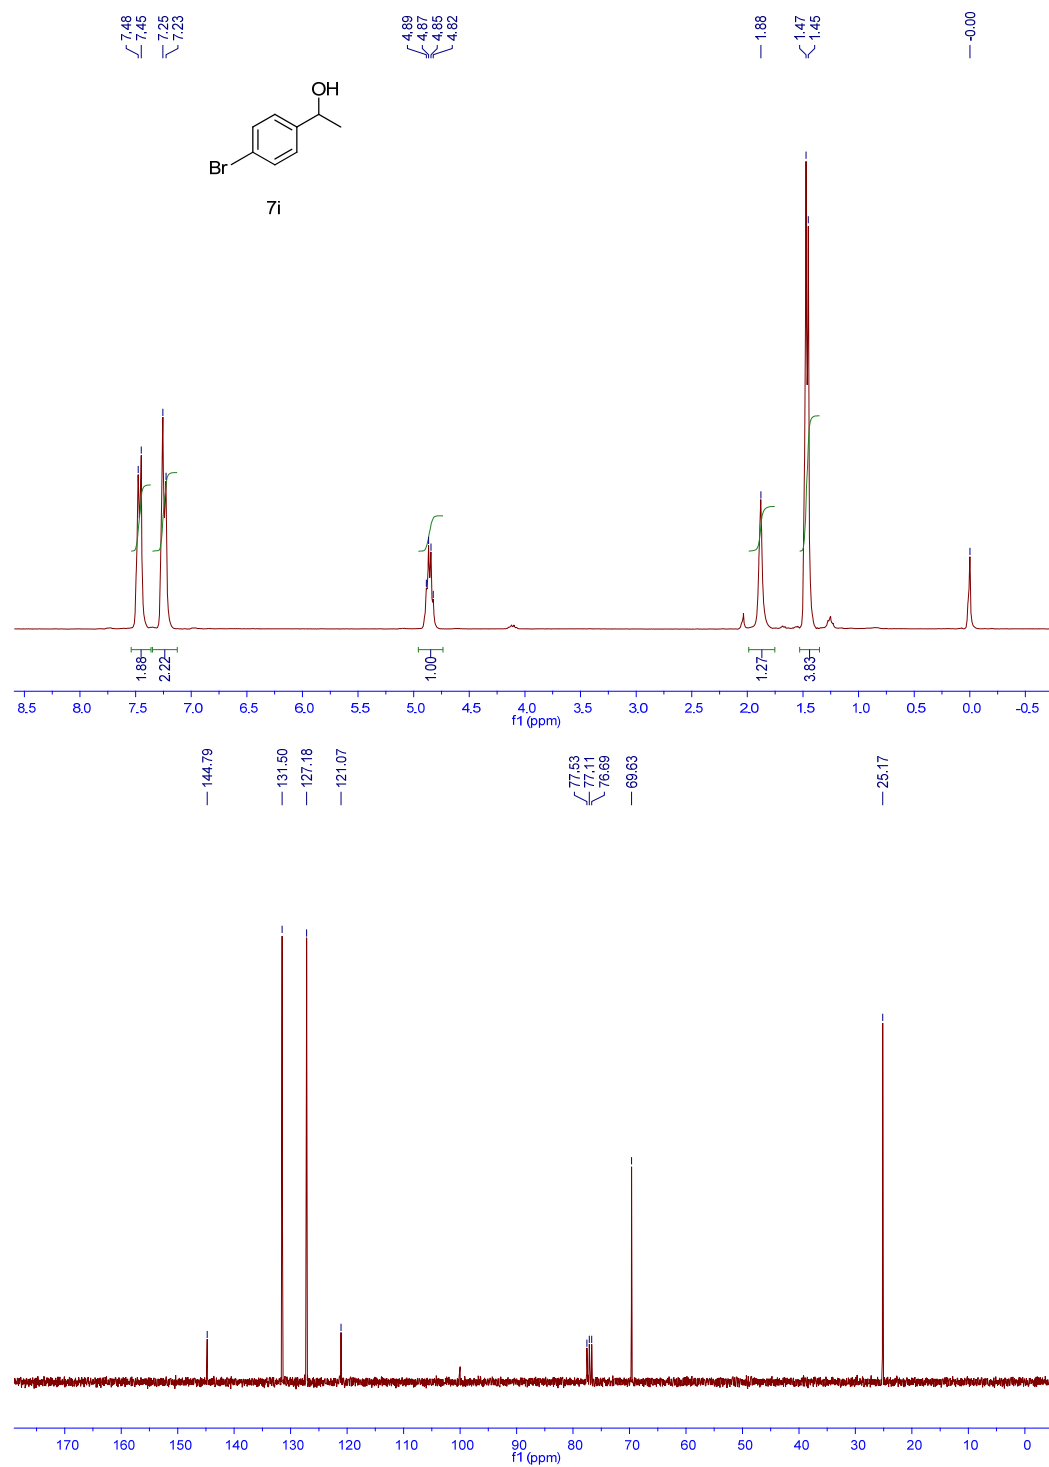

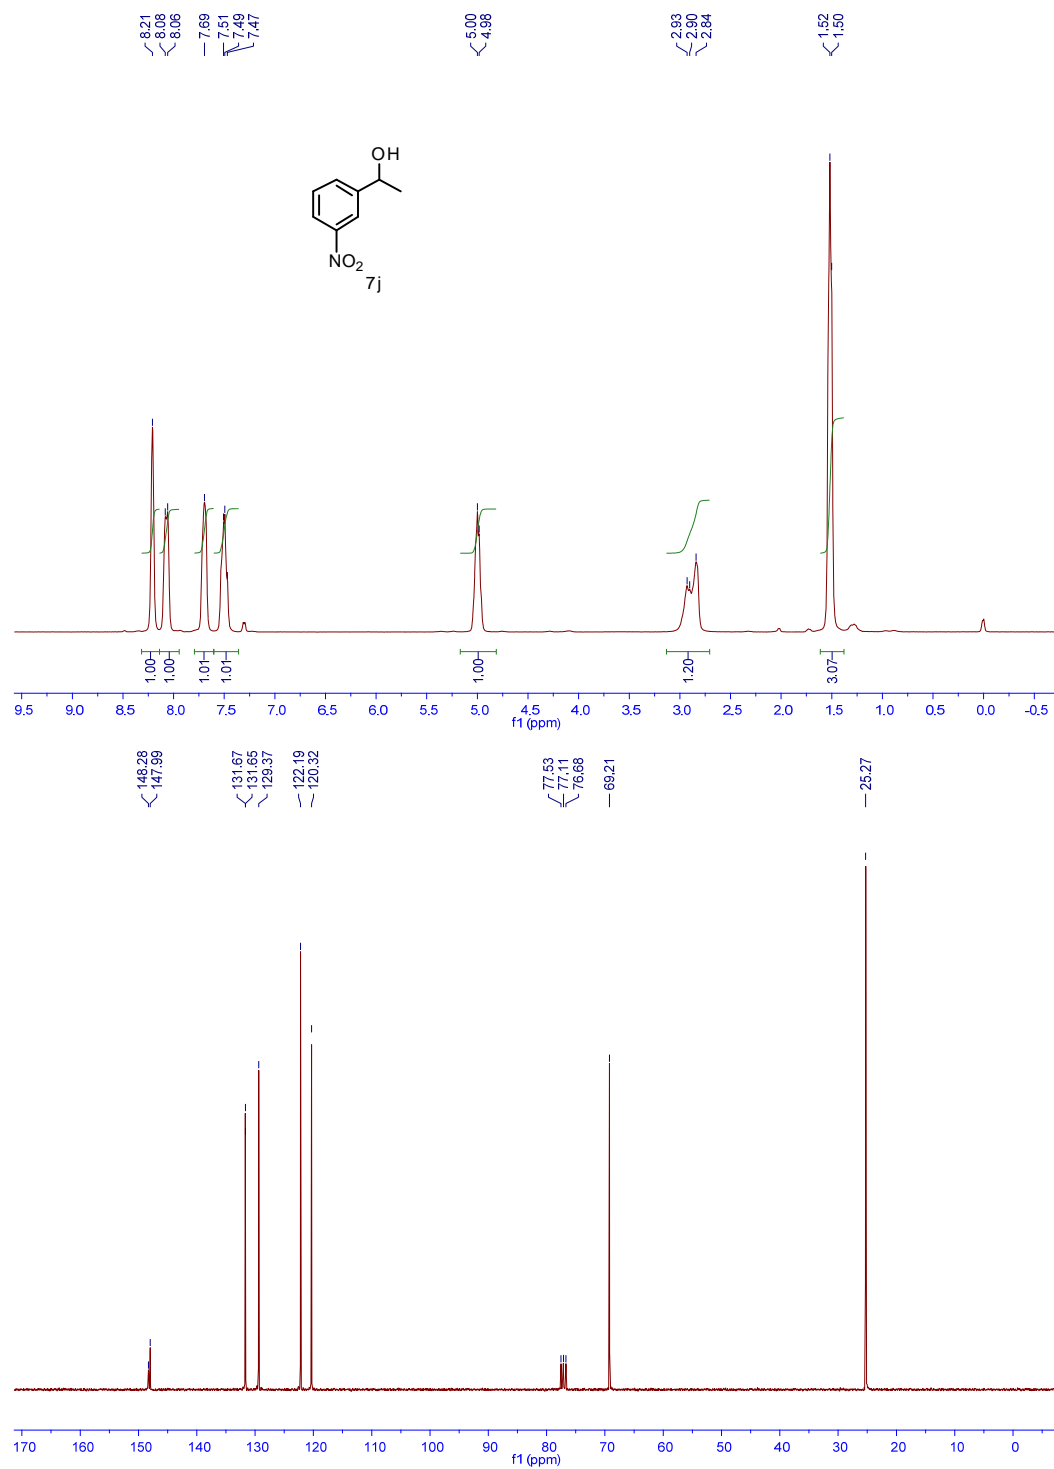

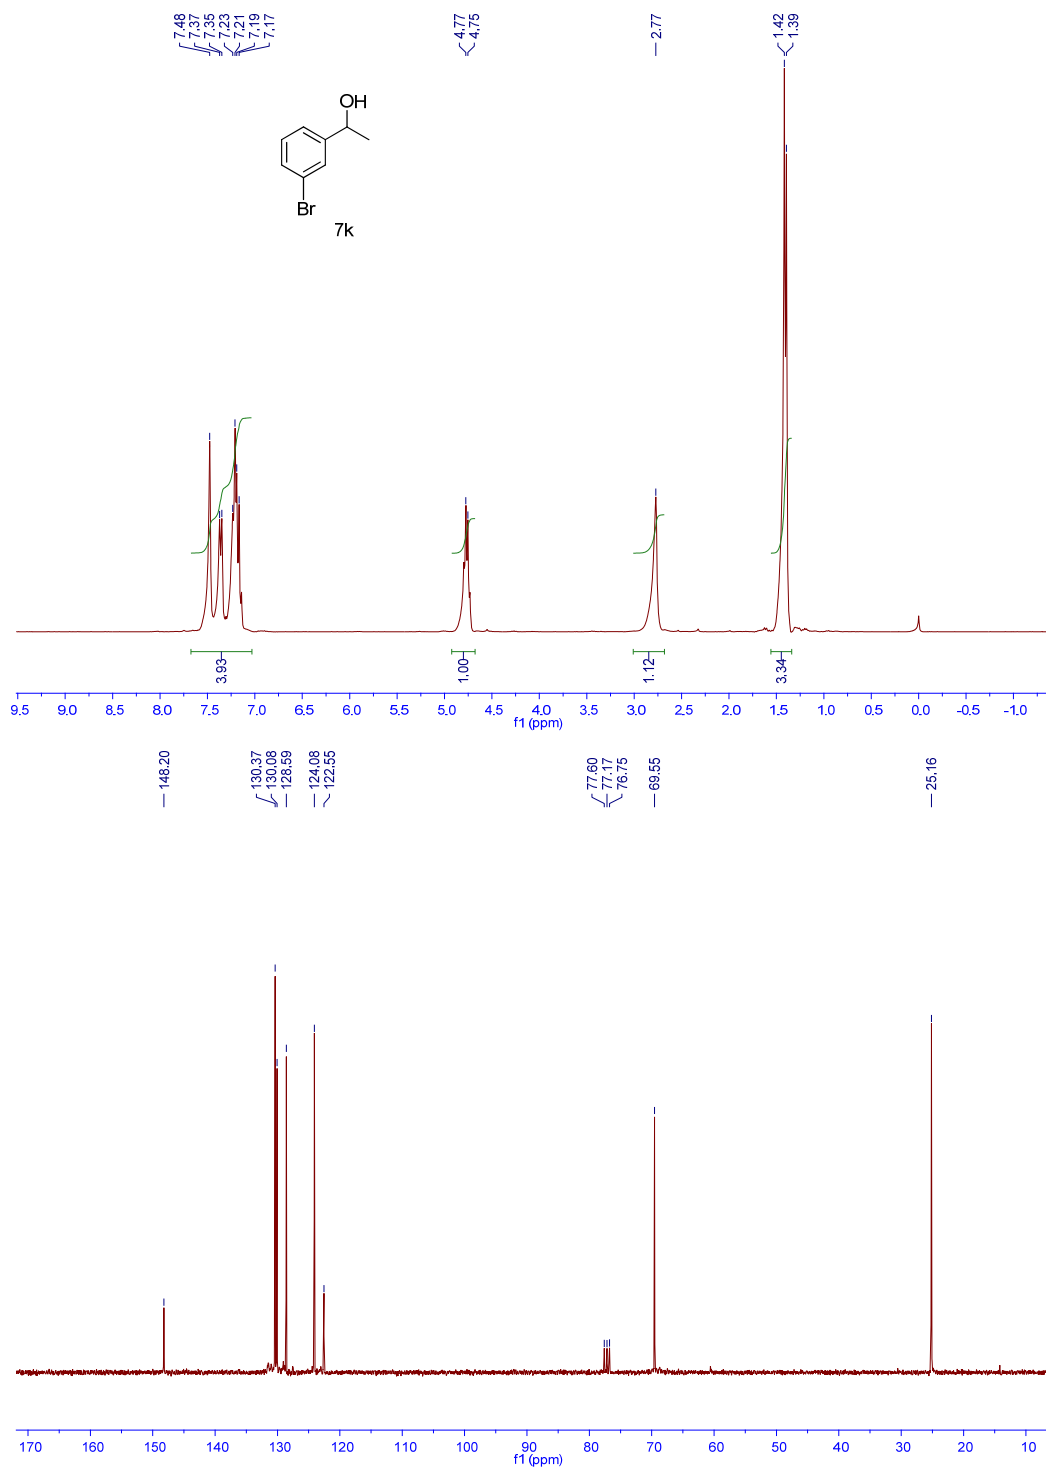

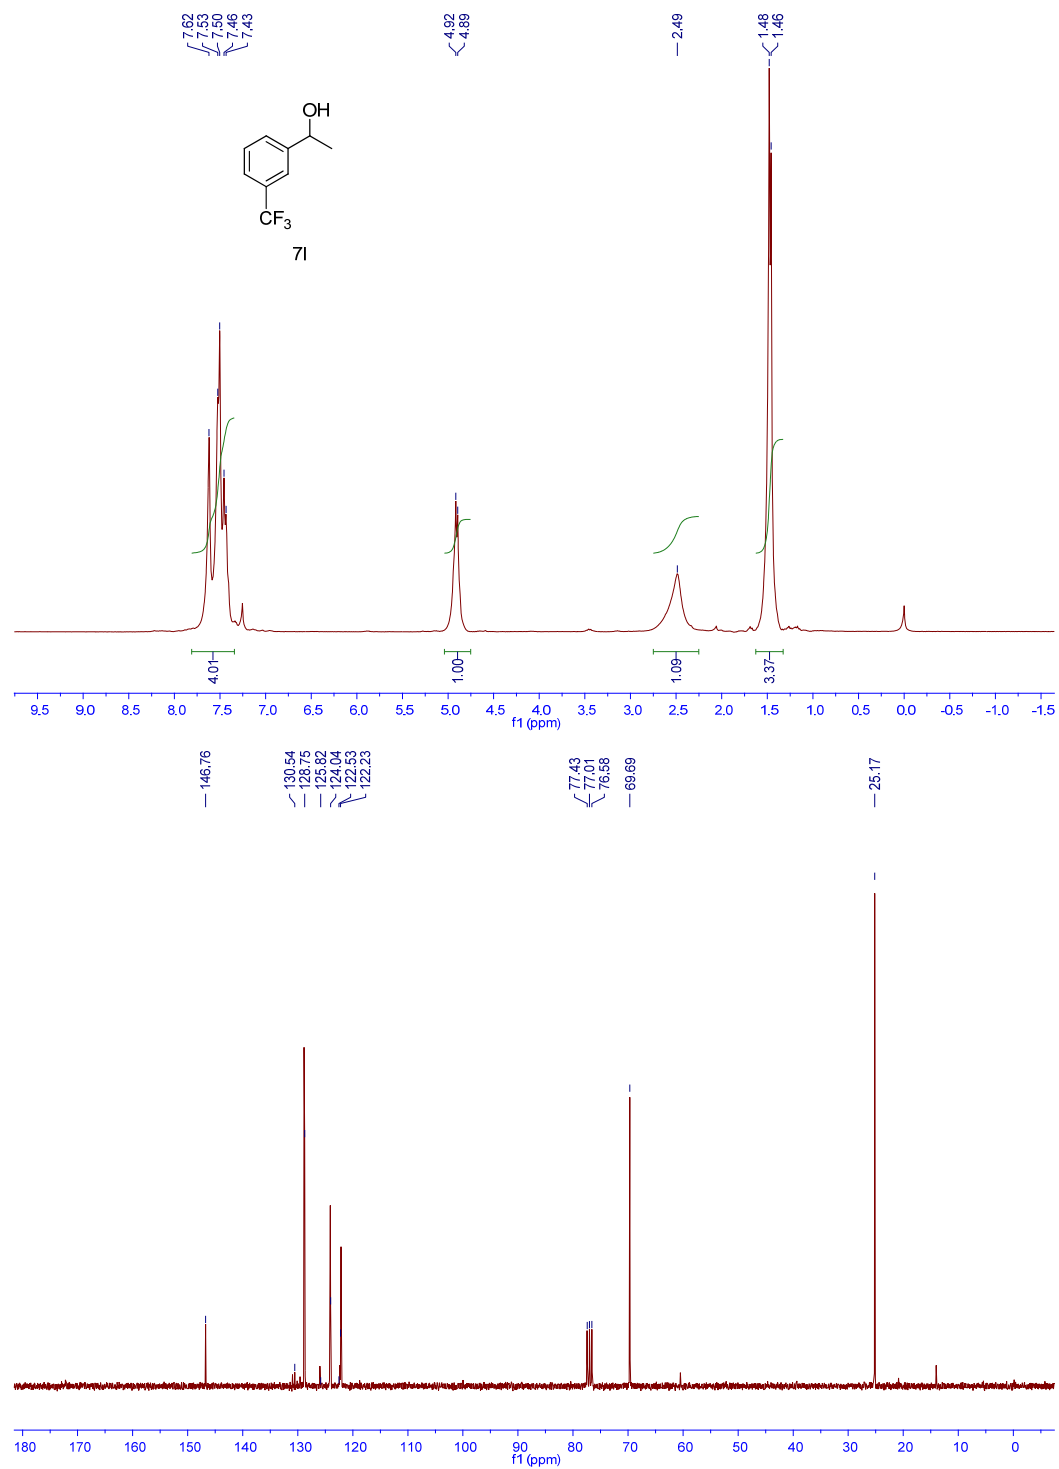

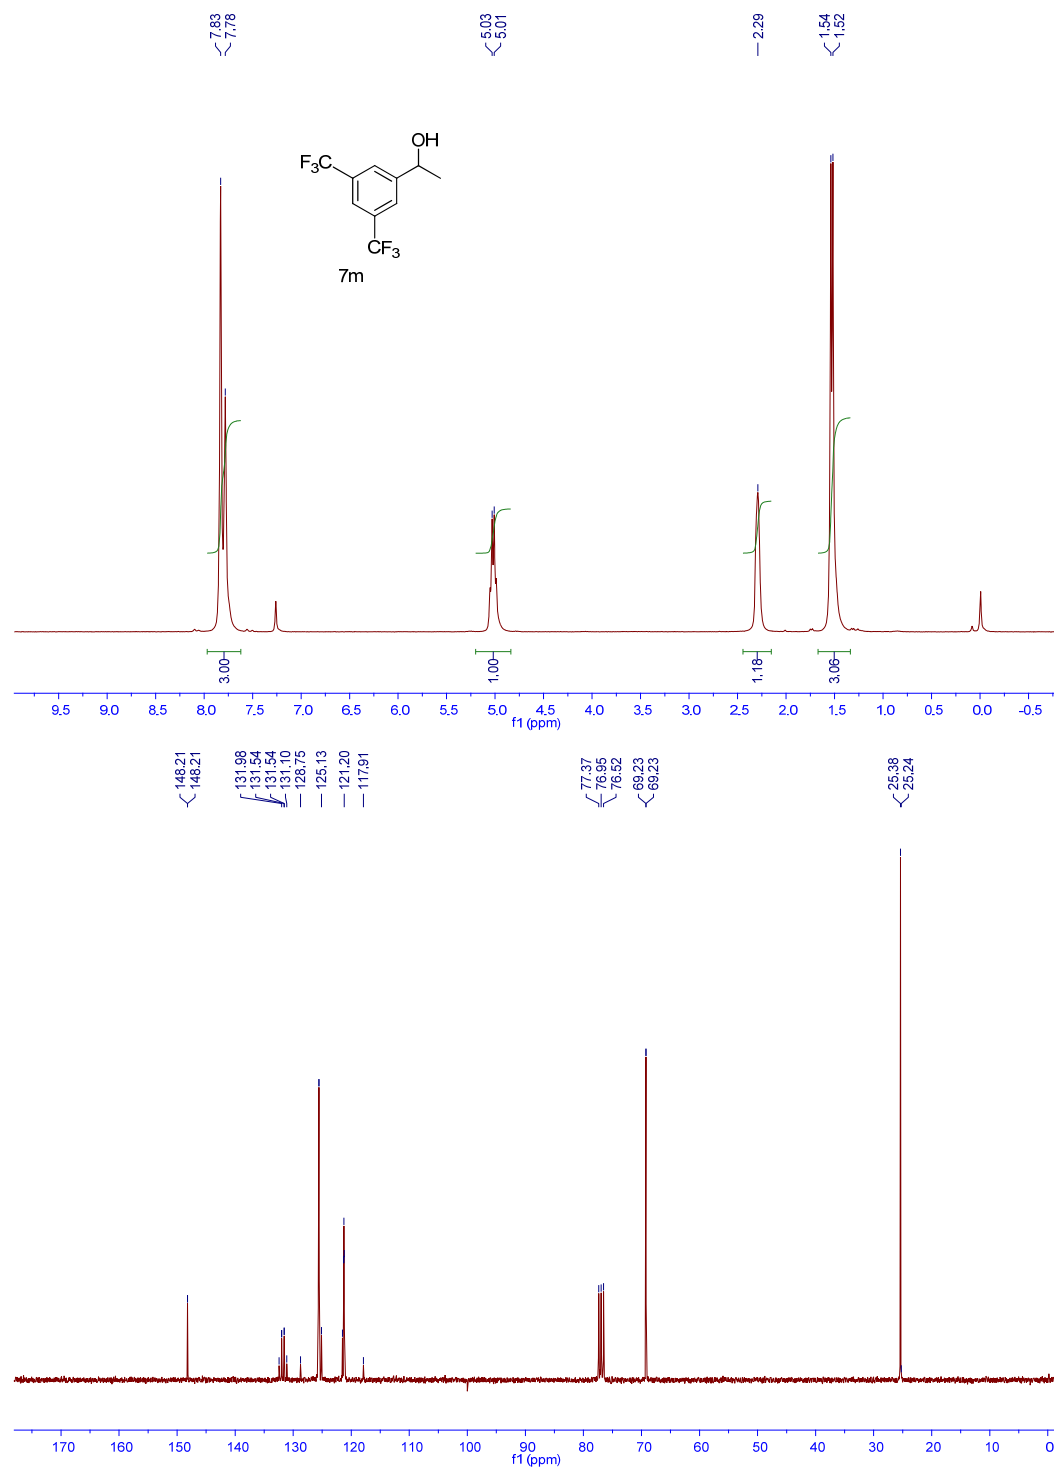

#



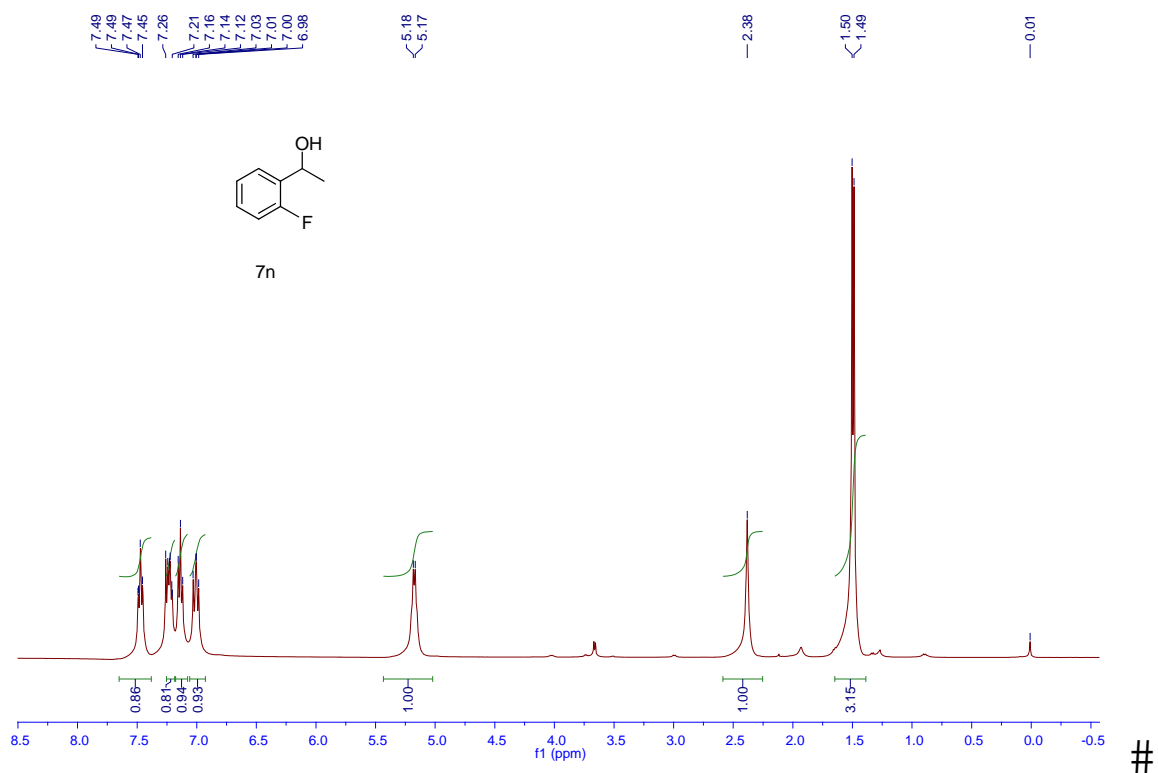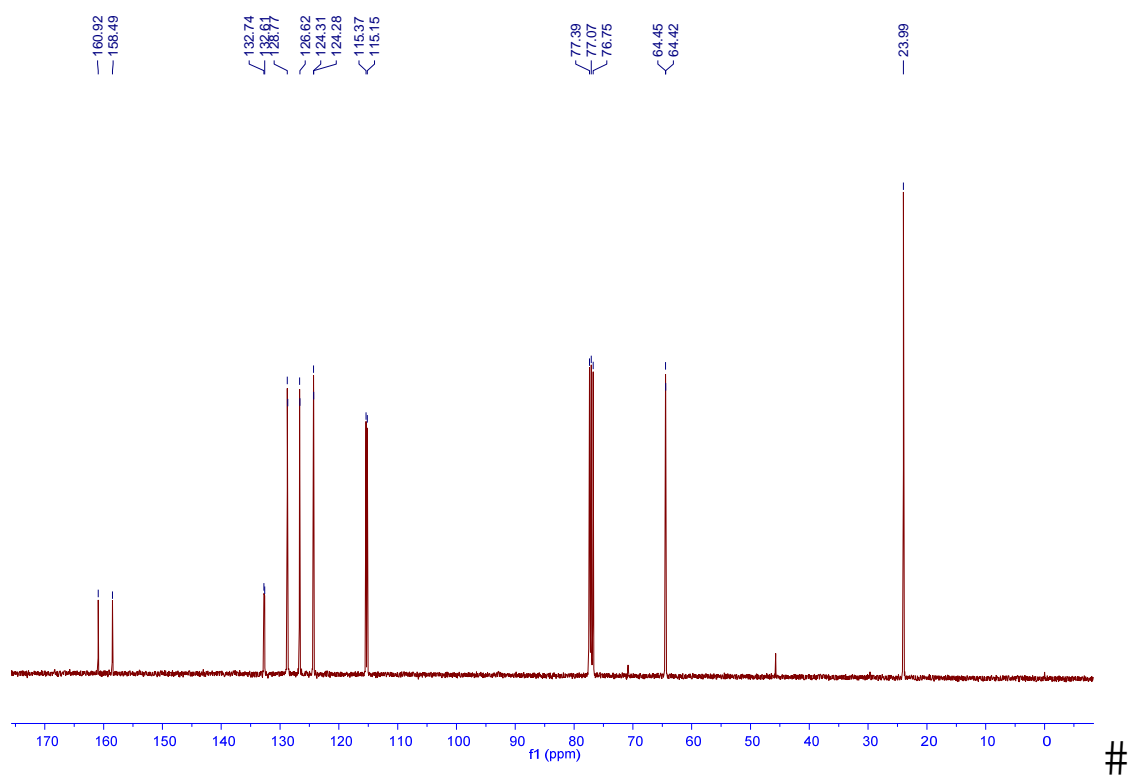

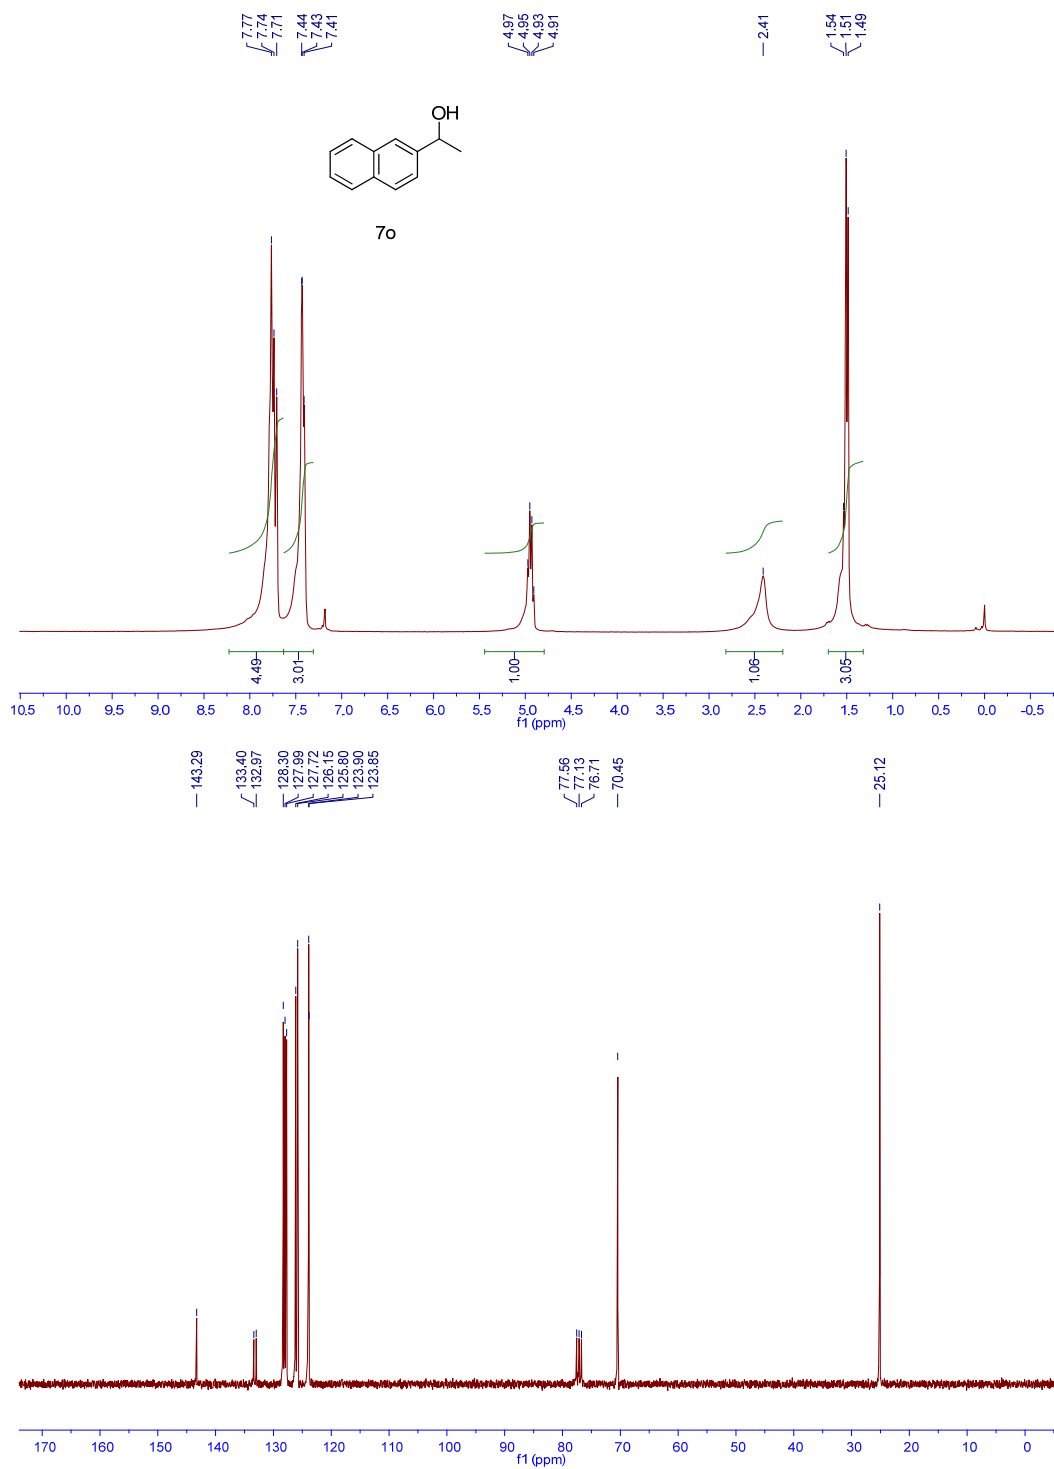

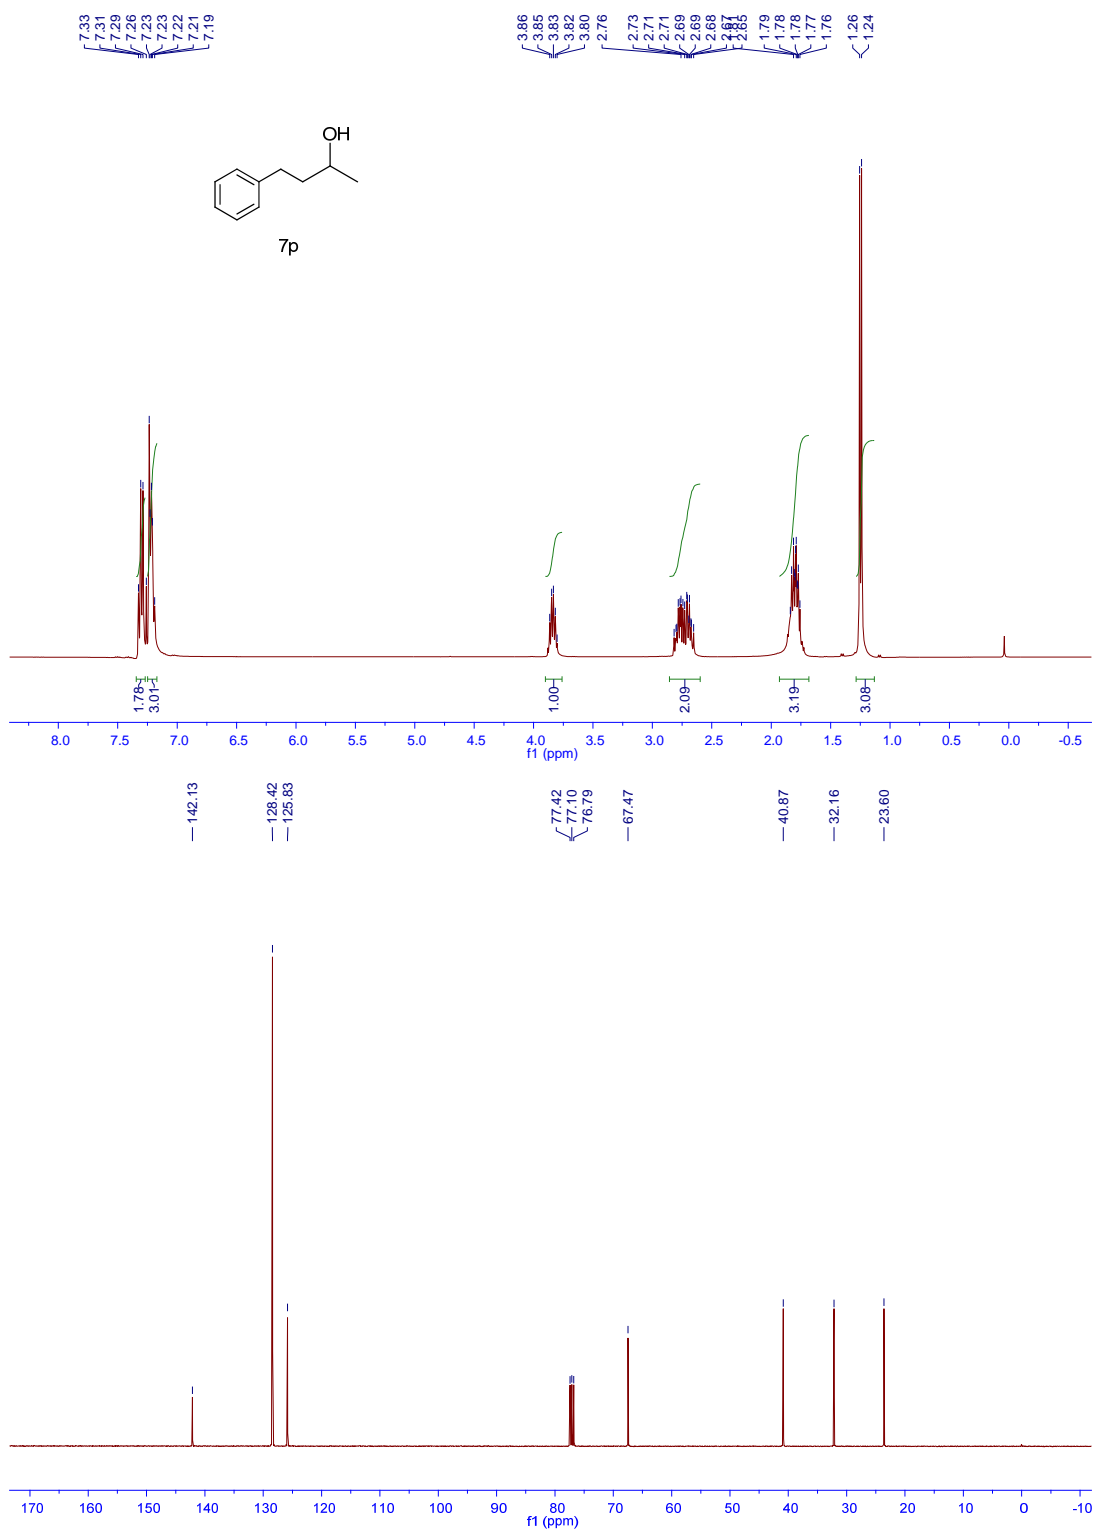

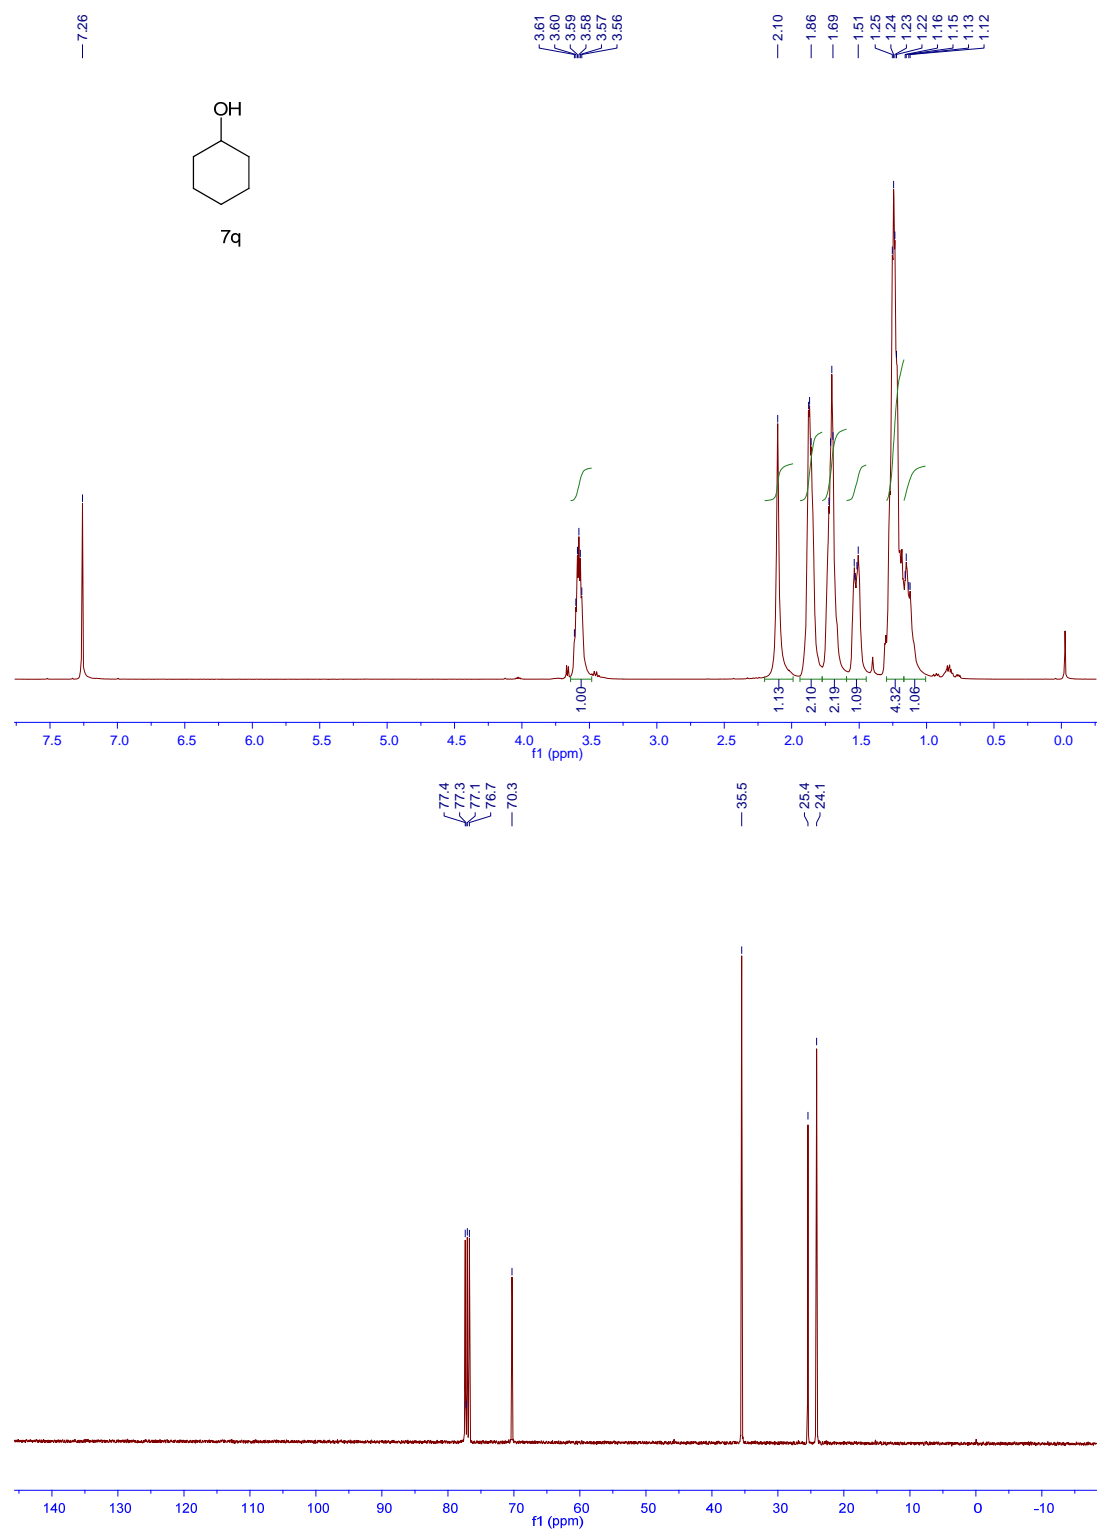

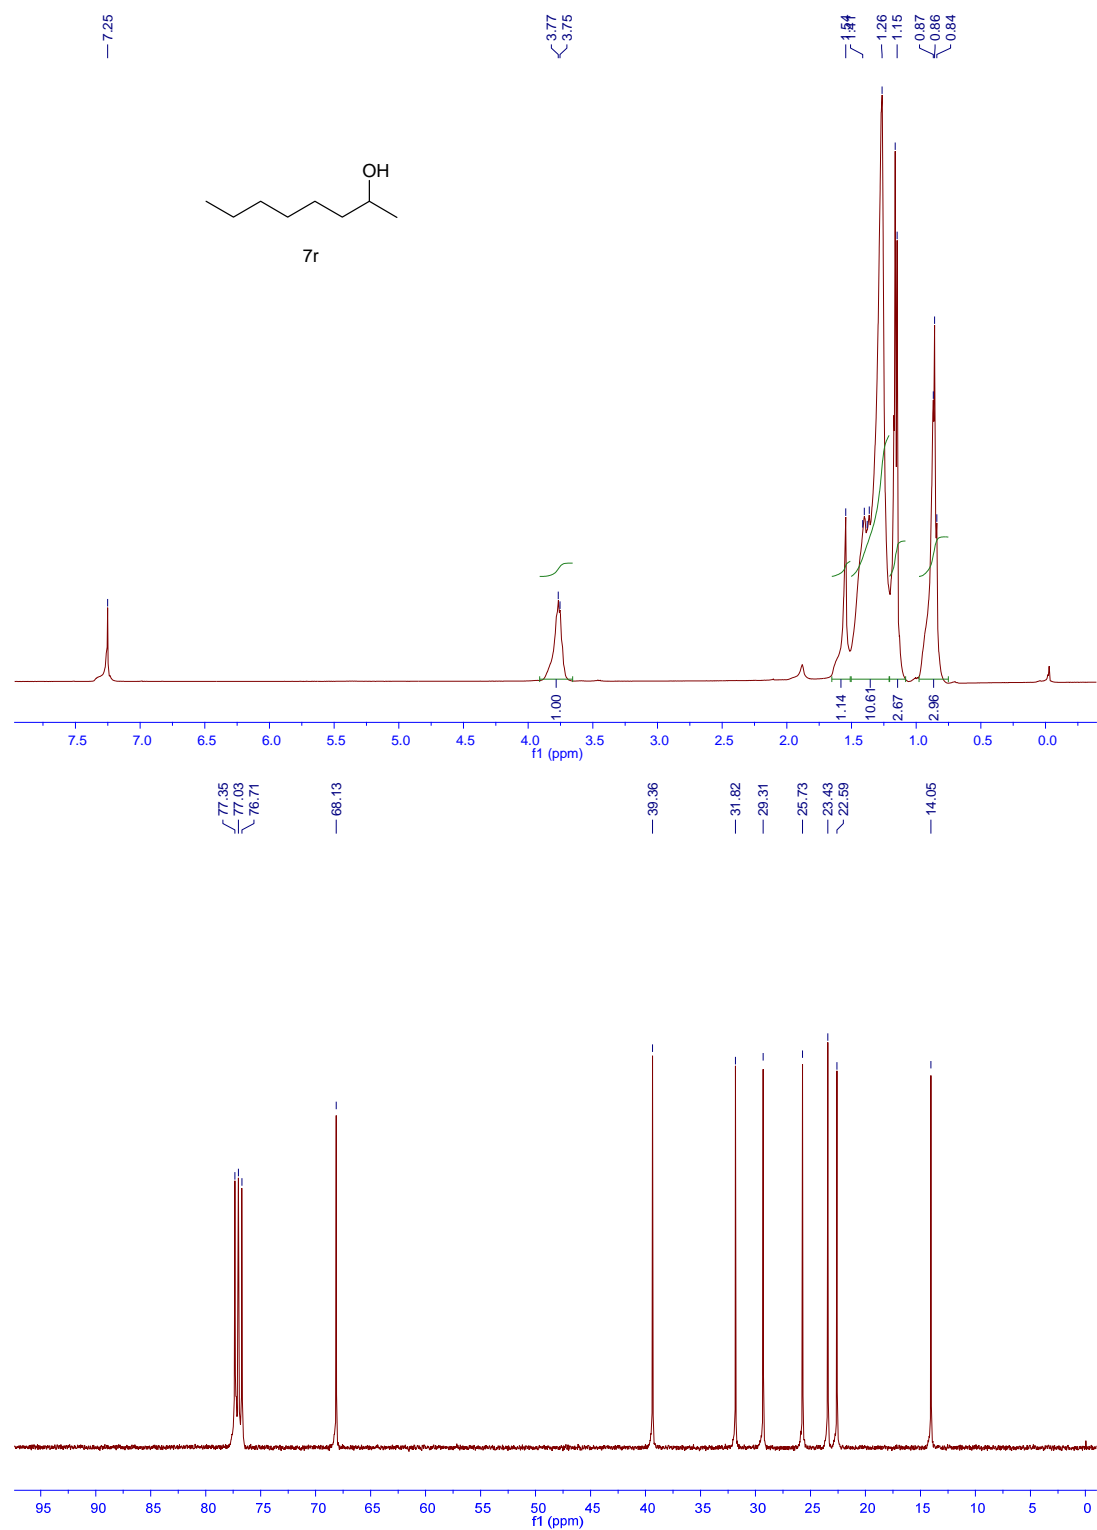

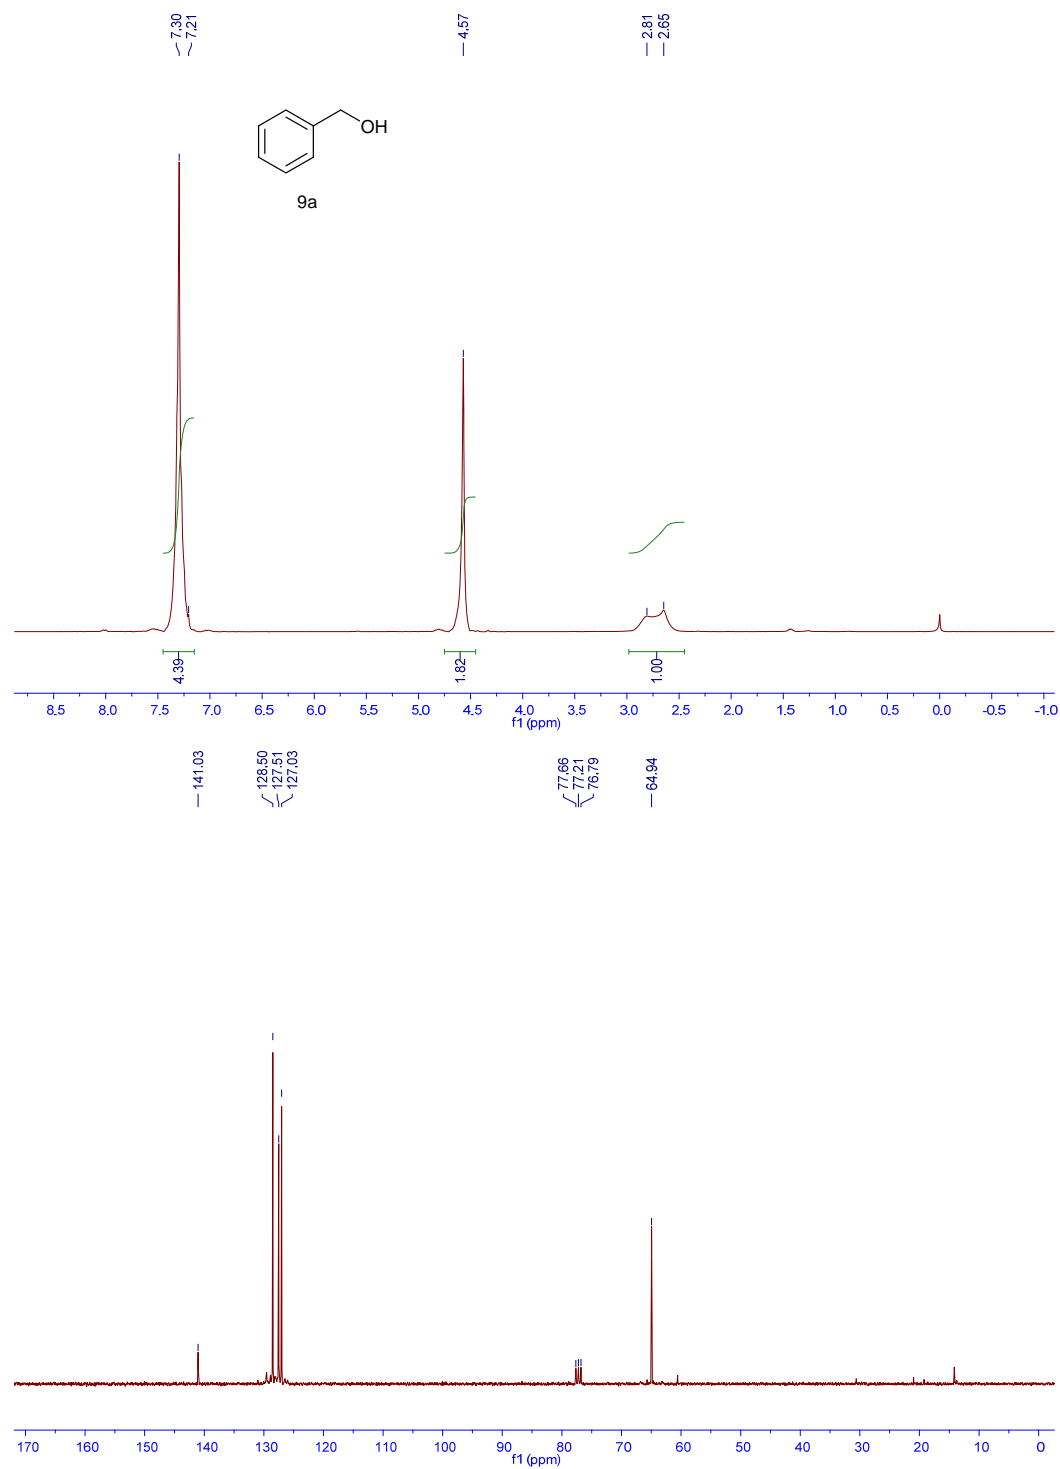

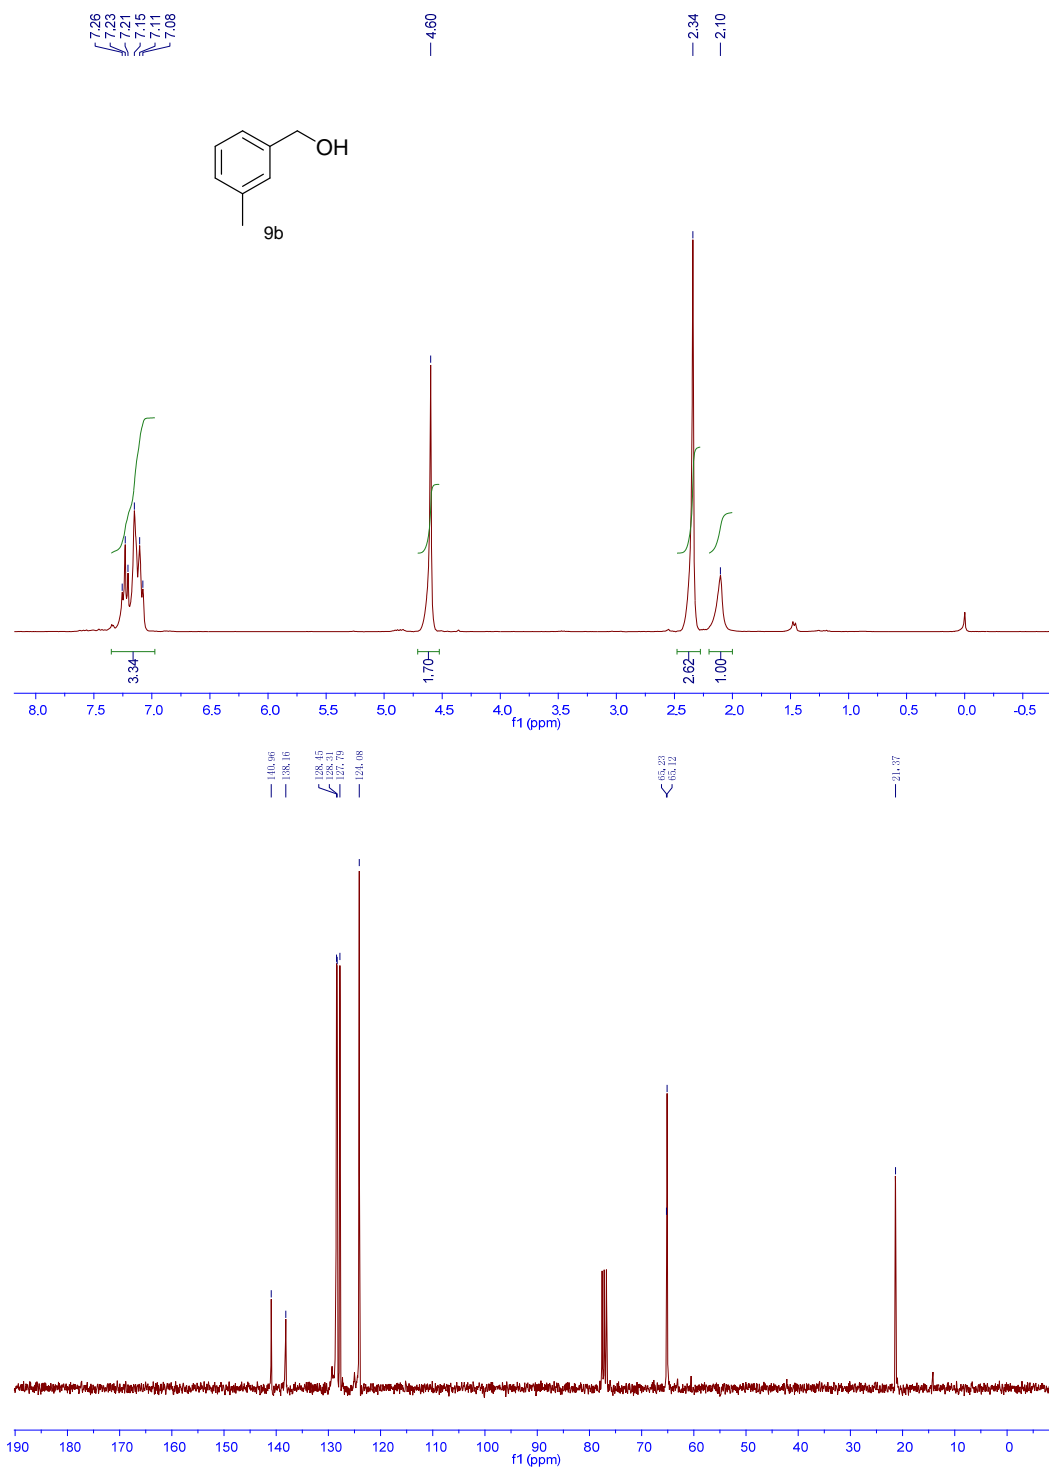

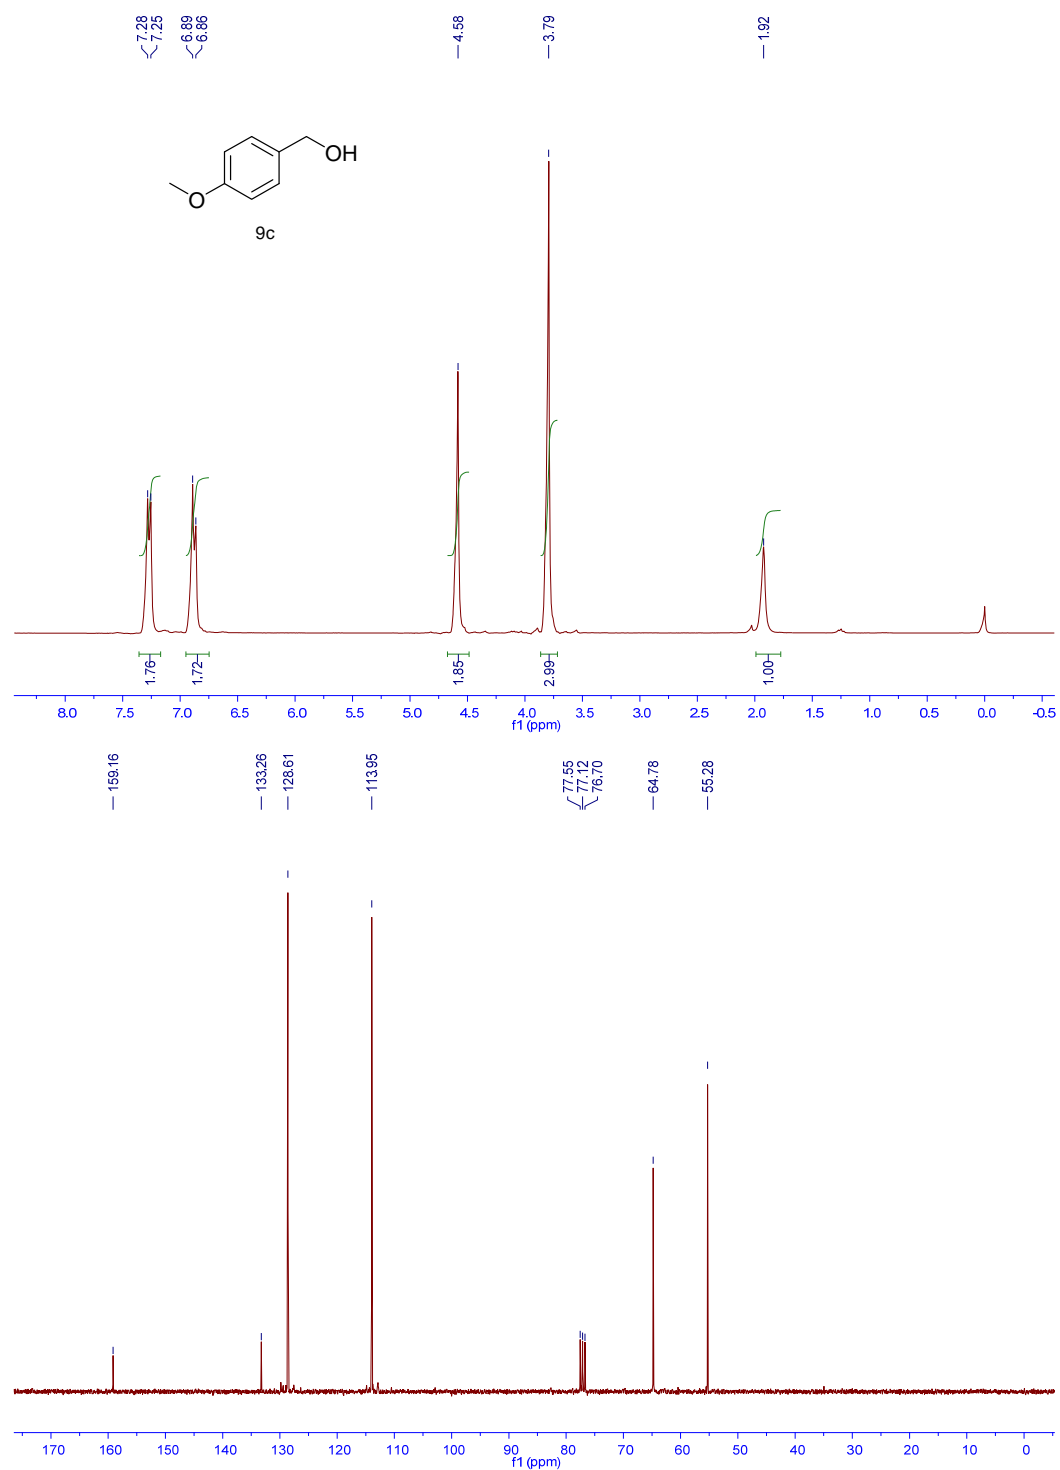



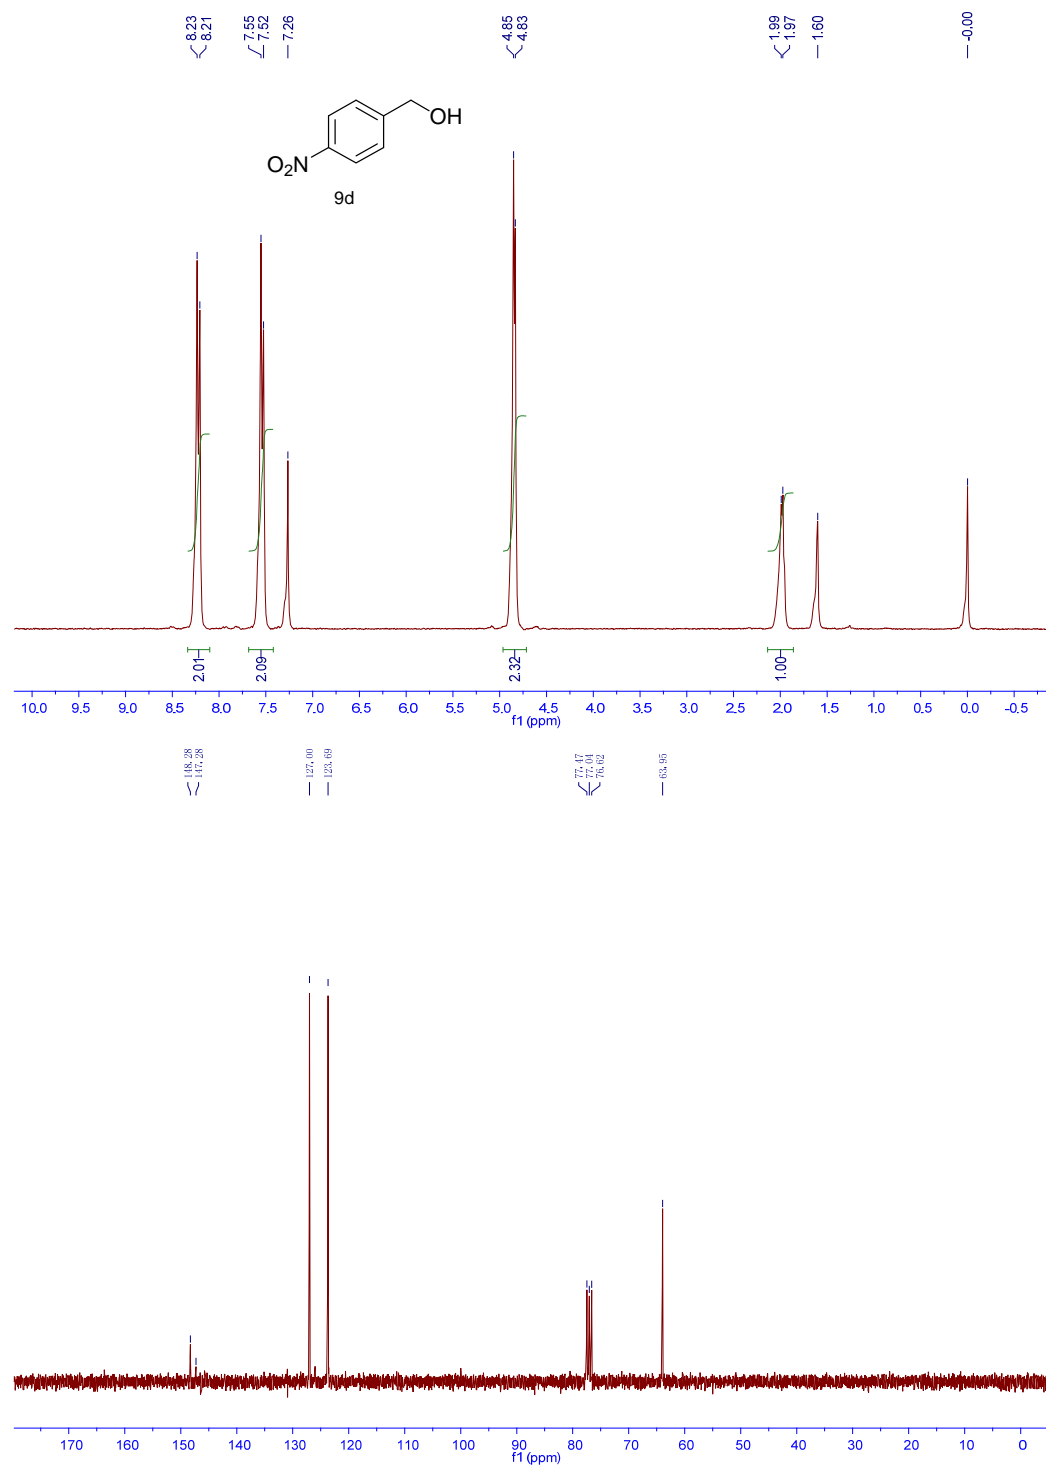

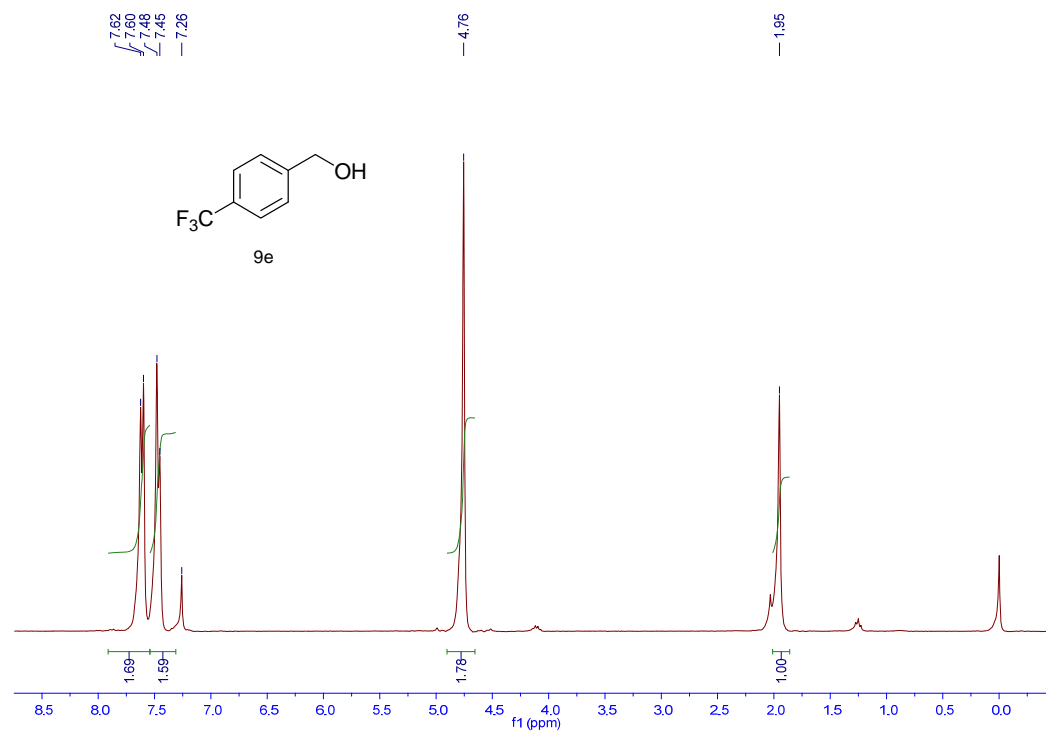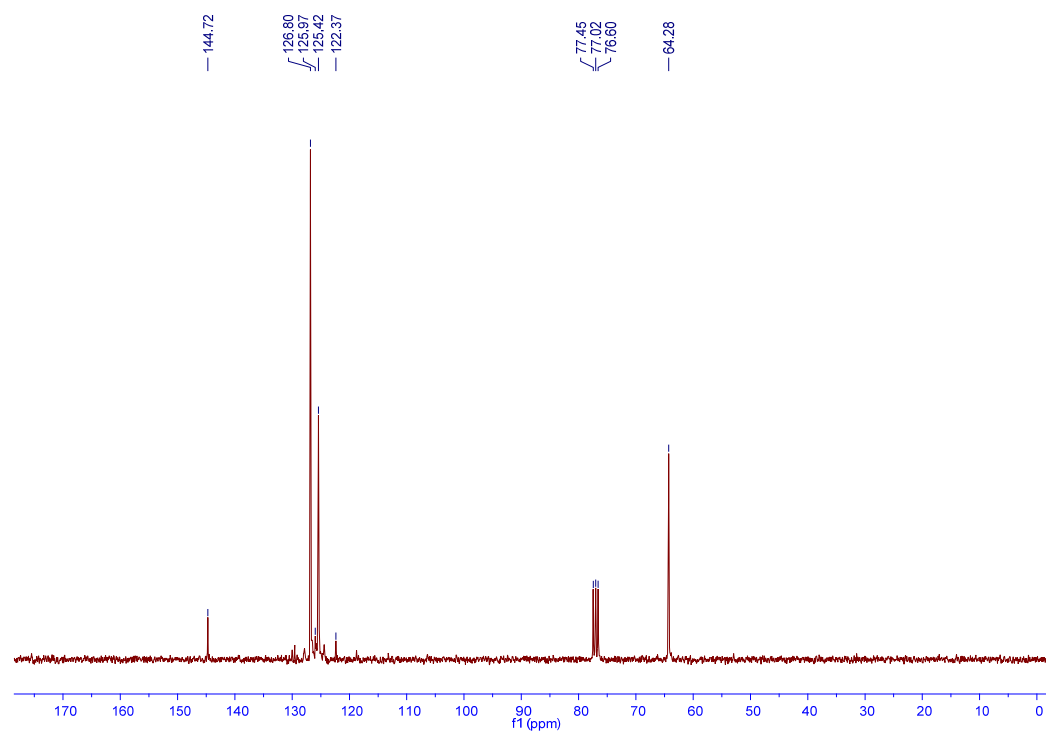

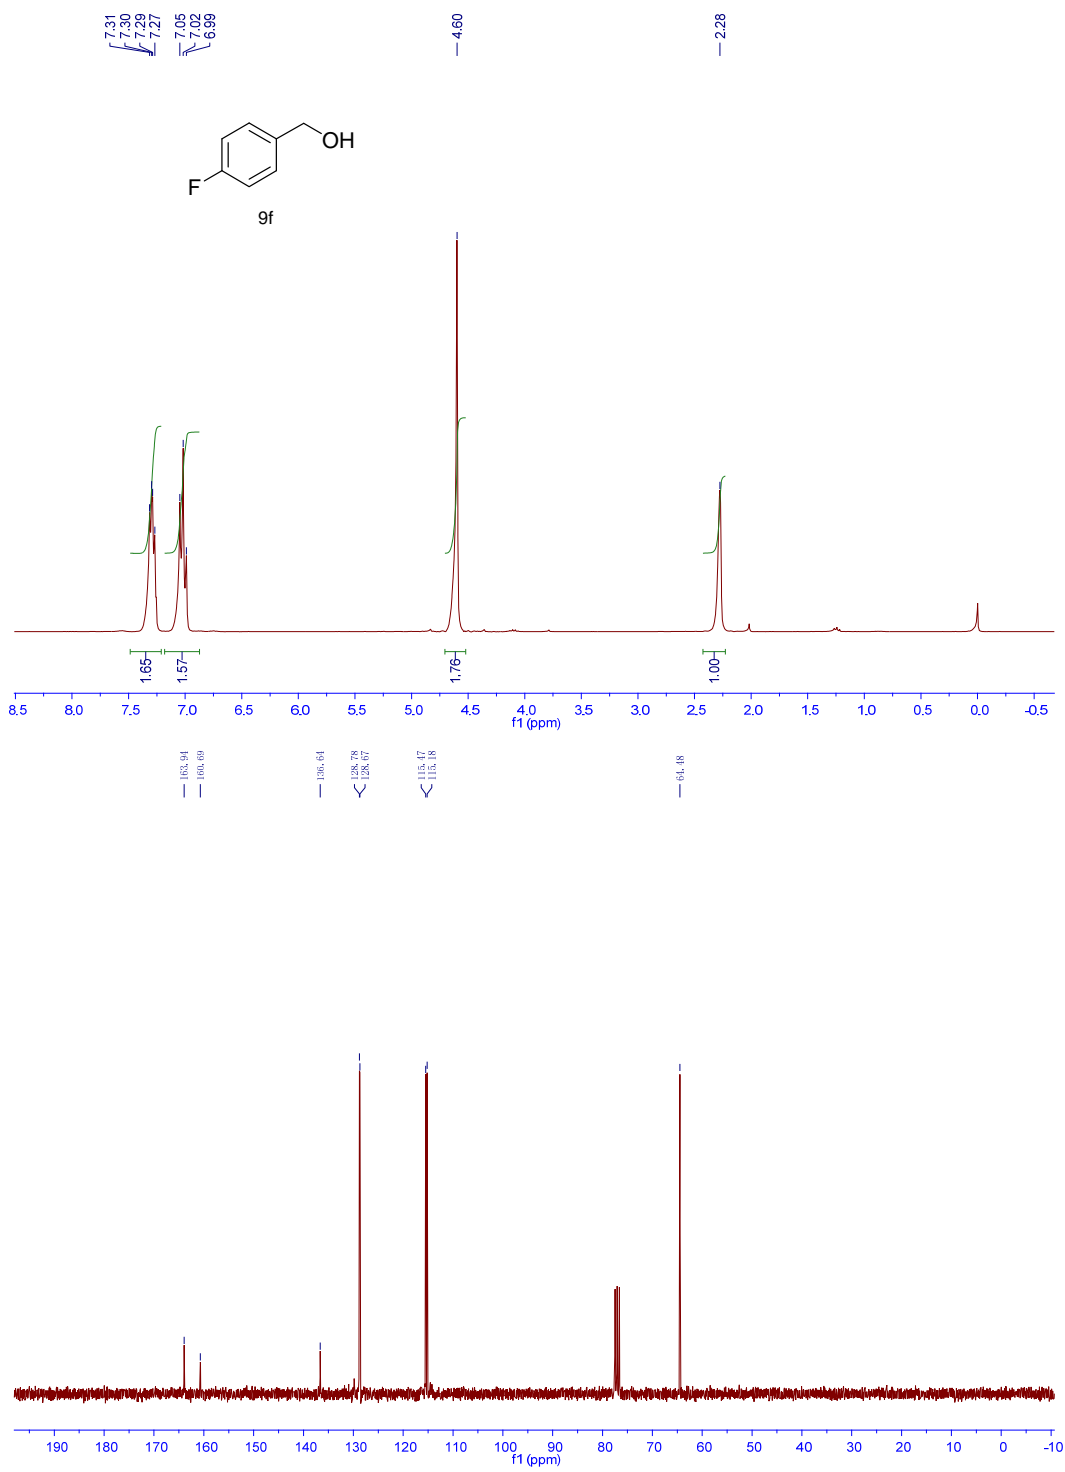

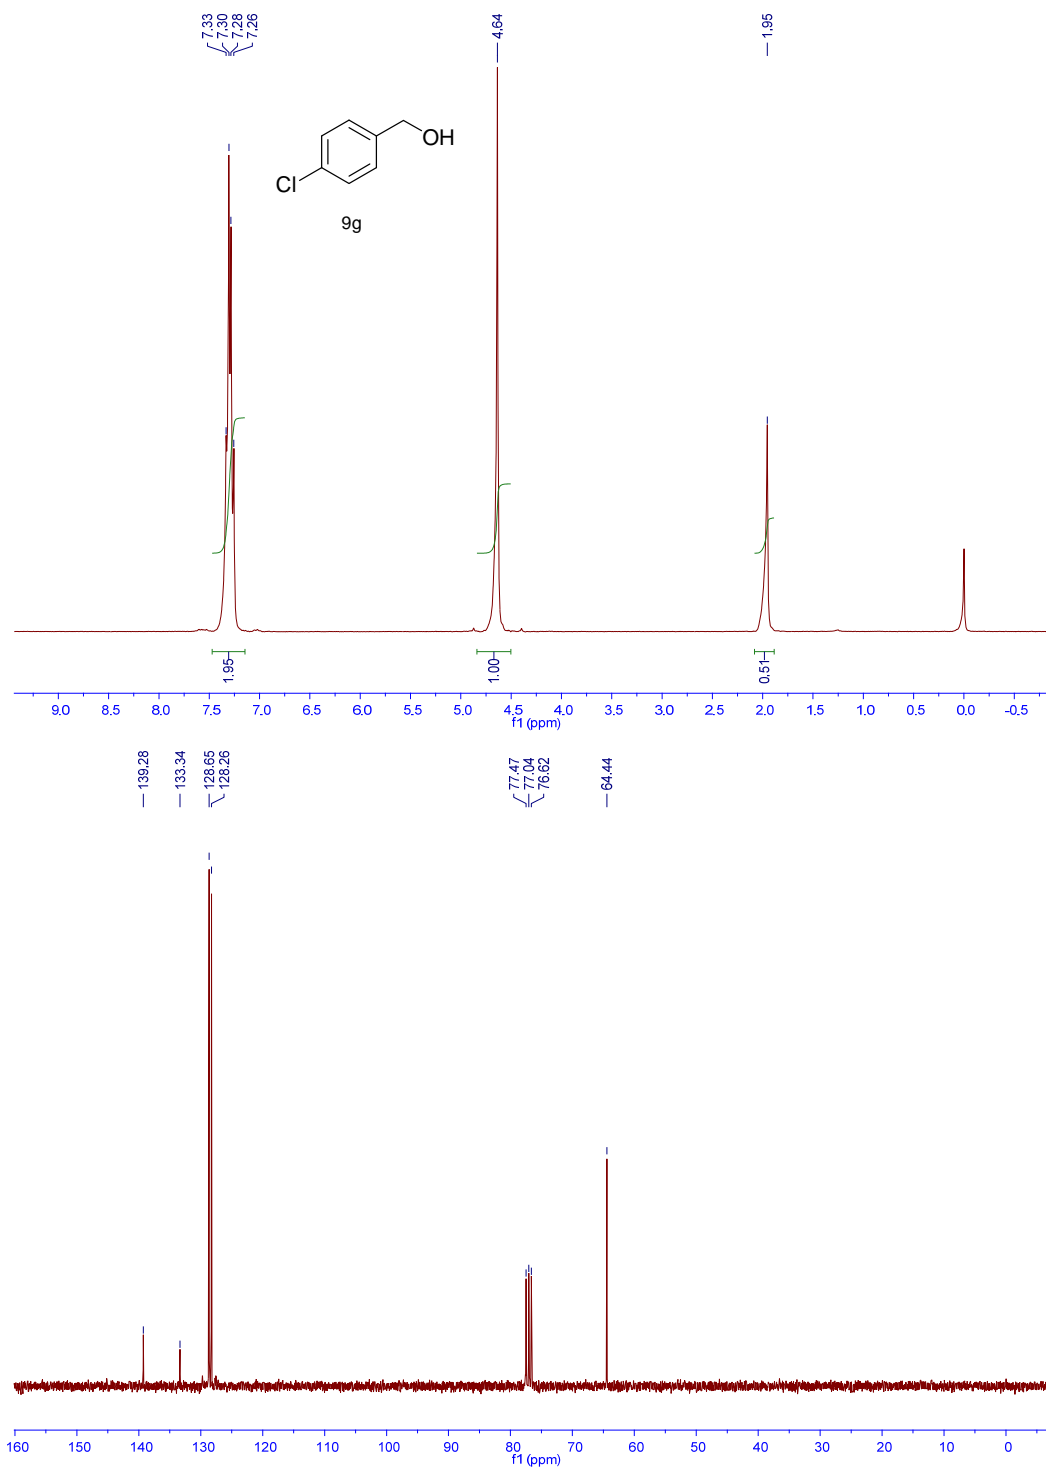

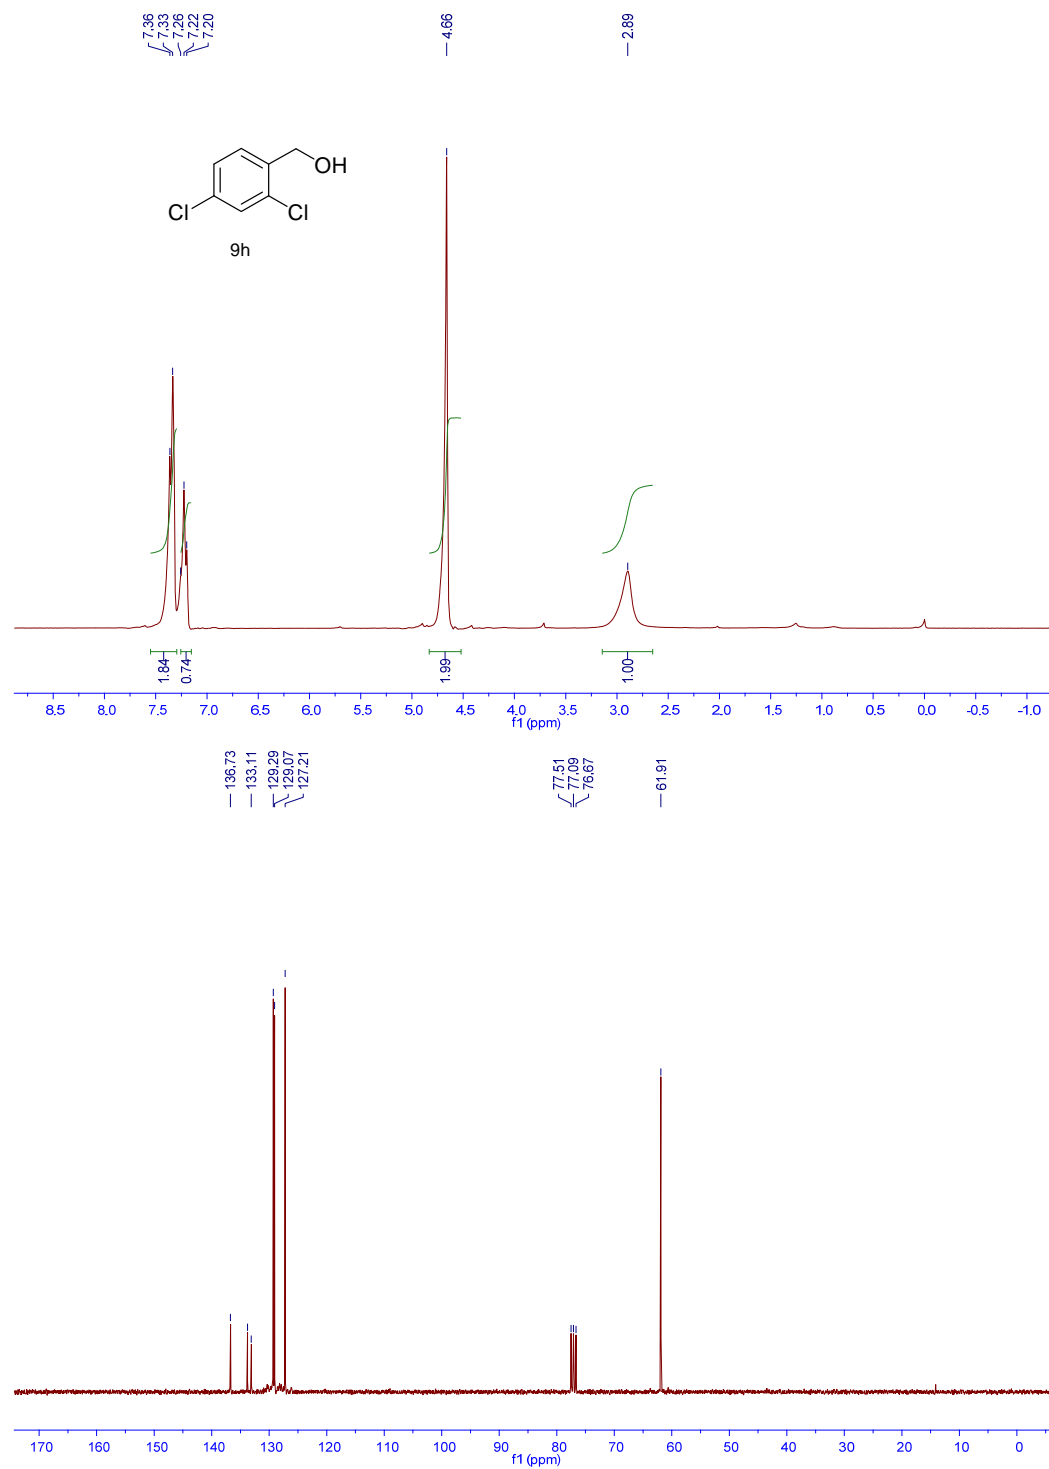

Supplement: c2gc36619c.pdf [file c2gc36619c.pdf]
